# Supplementary material
Source: PubMed Central journal article supplement (PMC3079323)
Supplement: NIHMS260958-supplement-SI2.pdf [file NIHMS260958-supplement-SI2.pdf]

kT 0.5961    ħ1000c1 2.857    ha 627.5    kT/h    6.25E+12

//6-31+G\*

|             | V     | V <sub>pcm</sub> | V <sub>pcm+zp</sub> | F     | $^{-kT \ln \Sigma e^{-\beta F_i}}$ | $\nu^\ddagger/\text{cm}^{-1}$ | R <sup>‡</sup> /Å |          |
|-------------|-------|------------------|---------------------|-------|------------------------------------|-------------------------------|-------------------|----------|
| cis         | 1.42  | 1.92             | 1.10                | 0.85  | 0.85                               |                               | 0.162195          |          |
| trans       | 0.00  | 0.90             | 0.00                | 0.00  | 0.00                               |                               | 0.190133          |          |
| 5ovLax      | 9.32  | 4.58             | 4.71                | 5.74  |                                    |                               | 0.253016          |          |
| 5ovLeq      | 9.96  | 5.69             | 5.95                | 7.09  |                                    |                               | 0.248199          |          |
| 5ovReq      | 8.38  | 5.04             | 5.26                | 6.38  |                                    |                               | 0.337091          |          |
| 5ovRax      | 9.33  | 4.65             | 4.77                | 5.90  |                                    |                               | 0.212947          |          |
| lumped      |       |                  |                     |       | 5.27                               |                               |                   |          |
| 5offReq     | 10.16 | 6.25             | 6.69                | 8.17  |                                    |                               | 0.286586          |          |
| 5offRax     | 12.14 | 5.77             | 6.07                | 7.30  |                                    |                               | 0.231481          |          |
| 5offLeq     | 11.48 | 7.19             | 7.51                | 8.87  |                                    |                               | 0.323433          |          |
| 5offLax     | 9.34  | 4.65             | 4.97                | 6.34  |                                    |                               | 0.231481          |          |
| lumped      |       |                  |                     |       | 6.20                               |                               |                   |          |
| 6ovBax      | 9.85  | 8.88             | 9.03                | 10.40 |                                    |                               | 0.294325          |          |
| 6ovBeq      | 9.93  | 9.15             | 9.08                | 10.17 |                                    |                               | 0.187347          |          |
| 6ovCax      | 2.93  | 1.13             | 1.52                | 3.20  |                                    |                               | 0.323812          |          |
| 6ovCeq      | 5.01  | 4.50             | 4.68                | 6.27  |                                    |                               | 0.304916          |          |
| lumped      |       |                  |                     |       | 3.19                               |                               |                   |          |
| 6offBax     | 9.49  | 7.96             | 7.85                | 9.18  |                                    |                               | 0.284392          |          |
| 6offBeq     | 9.54  | 9.41             | 9.20                | 10.33 |                                    |                               | 0.225724          |          |
| 6offCax     | 0.06  | 0.00             | 0.18                | 1.81  |                                    |                               | 0.32439           |          |
| 6offCeq     | 2.23  | 3.25             | 3.26                | 4.83  |                                    |                               | 0.300903          |          |
| lumped      |       |                  |                     |       | 1.80                               |                               |                   |          |
| cis=5offLax | 13.80 | 11.54            | 11.08               | 12.43 | 12.43                              | 253i                          | 2.072             | 0.282486 |
| cis=5ovRax  | 13.58 | 9.34             | 9.01                | 10.58 | 10.58                              | 261i                          | 1.978             | 0.291822 |
| cis=6offBax | 15.22 | 14.19            | 13.71               | 15.26 | 15.26                              | 242i                          | 2.071             | 0.338379 |
| cis=6ovCax  | 7.58  | 4.29             | 3.78                | 5.43  | 5.43                               | 223i                          | 2.110             | 0.361241 |
| tr=5ovLax   | 10.45 | 8.02             | 7.44                | 8.13  | 8.13                               | 250i                          | 1.940             | 0.093266 |
| tr=5offRax  | 9.98  | 7.32             | 6.83                | 8.33  | 8.33                               | 217i                          | 1.902             | 0.294104 |
| tr=6offCax  | 4.46  | 3.24             | 2.63                | 4.30  | 4.30                               | 225i                          | 2.096             | 0.338362 |
| tr=6ovBax   | 13.06 | 11.92            | 11.30               | 12.62 | 12.62                              | 262i                          | 2.016             | 0.239402 |
| wrong5-6    | 30.34 |                  |                     |       |                                    |                               |                   |          |

kescape-1

|         |    |        |       |          |           |
|---------|----|--------|-------|----------|-----------|
| cis     | 0  | -12.8  | 1E-04 | 12.07297 | -1.13197  |
| trans   | 2  | -11.34 | 1E-05 | 10.7004  | -1.045316 |
| 5ovLax  | 4  | -9.882 | 1E-06 | 9.327828 | -0.893044 |
| 5ovLeq  | 6  | -8.425 | 1E-07 | 7.955257 | -0.903126 |
| 5offReq | 8  | -6.967 | 1E-08 | 6.582686 | -0.74585  |
| 5offRax | 10 | -5.51  | 1E-09 | 5.210115 | -0.984337 |
| 5ovReq  | 12 | -4.053 | 1E-10 | 3.837544 | -0.828335 |
| 5ovRax  |    |        | 1E-11 | 2.464973 | -0.93991  |
| 5offLeq |    |        |       |          | -0.766659 |
| 5offLax |    |        |       |          | -0.93991  |
| 6ovBax  |    |        |       |          | -0.814645 |
| 6ovBeq  |    |        |       |          | -1.053311 |
| 6ovCax  |    |        |       |          | -0.766068 |

|            |           |
|------------|-----------|
| 6ovCeq     | -0.796572 |
| 6offBax    | -0.832292 |
| 6offBeq    | -0.953272 |
| 6offCax    | -0.765168 |
| 6offCeq    | -0.803334 |
|            |           |
| #REF!      | -0.835759 |
| #REF!      | -0.819027 |
| #REF!      | -0.74394  |
| #REF!      | -0.711385 |
| tr=5ovLax  | -1.441709 |
| tr=5offRax | -0.81503  |
| tr=6offCax | -0.743965 |
| tr=6ovBax  | -0.922123 |
| wrong5-6   |           |

0.292988 0.344577 0.483126 0.61967 0.858022 1.011994 1.080268 1.24024 1.510463  
0.263167 0.45605 0.551716 0.698071 0.950435 1.04068 1.078666 1.134043 1.445338  
0.354125 0.499141 0.828685 0.953358 1.078131 1.094325 1.32756 1.563035 1.839403  
0.342374 0.530011 0.922024 0.967382 1.106685 1.165091 1.361009 1.508758 1.900113  
0.444324 0.572054 0.867102 1.032717 1.21527 1.246073 1.309619 1.495903 1.656233  
0.346321 0.56168 0.922004 1.139498 1.246984 1.357813 1.378652 1.681679 1.766424

0.332893 0.497658 0.884188 0.990121 1.061802 1.169279 1.307184 1.401228 1.7812  
0.340611 0.50659 0.953637 1.074222 1.20826 1.273689 1.307355 1.481961 1.807174  
0.393455 0.523498 0.845775 1.000653 1.174618 1.253157 1.399241 1.524235 1.76969  
0.340611 0.50659 0.953637 1.074222 1.20826 1.273689 1.307355 1.481961 1.807174

0.321605 0.654357 0.965661 1.063963 1.167332 1.311492 1.387563 1.570474 1.965242  
0.292005 0.629338 0.957667 1.041117 1.243142 1.343222 1.451345 1.71222 1.882346  
0.470604 0.722283 0.95798 1.034472 1.141842 1.406481 1.491123 1.692616 2.012028  
0.479768 0.739133 0.91879 0.989189 1.108988 1.374733 1.447517 1.733697 1.987087

0.325136 0.63023 0.961938 1.094071 1.174116 1.270155 1.460362 1.623534 1.841504  
0.301867 0.606913 0.949509 1.075291 1.188568 1.281783 1.455501 1.629684 1.749047  
0.460505 0.688833 1.001786 1.082542 1.141969 1.33212 1.417453 1.806668 1.900483  
0.470752 0.703962 0.954615 1.097976 1.132295 1.310589 1.401399 1.839375 1.899958

0.418226 0.505508 0.9588 1.046972 1.160607 1.177528 1.293133 1.432644 2.01051  
0.445753 0.549209 1.05934 1.100268 1.254343 1.312192 1.418414 1.484635 1.930189  
0.354982 0.706699 0.962489 1.080098 1.185177 1.217108 1.336767 1.608493 2.056178  
0.440955 0.711119 0.781378 1.067683 1.128817 1.396206 1.4894 1.638842 2.015251  
0.418833 0.521356 0.88649 0.962479 1.114323 1.153629 1.281126 1.600056 1.924372  
0.439285 0.526991 0.998641 1.131155 1.217718 1.23992 1.393977 1.604819 1.86382  
0.452707 0.723797 0.993785 1.009308 1.166067 1.288379 1.437601 1.736968 1.926409  
0.332898 0.688993 0.931337 1.039248 1.11783 1.301191 1.471176 1.679334 1.967581

-0.816981 -0.734862 -0.571859 -0.46046 -0.328837 -0.269295 -0.247241 -0.203583 -0.148725  
-0.872491 -0.598799 -0.511412 -0.410264 -0.29131 -0.259745 -0.247733 -0.231412 -0.160202  
-0.721249 -0.556804 -0.342046 -0.290215 -0.247897 -0.24298 -0.18363 -0.140136 -0.103161  
-0.738066 -0.529447 -0.302236 -0.285031 -0.239306 -0.22283 -0.176597 -0.149014 -0.096563  
-0.611092 -0.49533 -0.324884 -0.262353 -0.209751 -0.202174 -0.187536 -0.151208 -0.126242  
-0.732343 -0.503437 -0.302243 -0.229876 -0.201955 -0.177256 -0.173014 -0.122719 -0.111749  
-0.752139 -0.558172 -0.317611 -0.27687 -0.25298 -0.221702 -0.188074 -0.168549 -0.109949  
-0.740649 -0.550008 -0.29011 -0.249103 -0.211522 -0.195654 -0.188036 -0.153629 -0.106861  
-0.669464 -0.535046 -0.334269 -0.27319 -0.220273 -0.200477 -0.168937 -0.146419 -0.111348  
-0.740649 -0.550008 -0.29011 -0.249103 -0.211522 -0.195654 -0.188036 -0.153629 -0.106861  
-0.769522 -0.437241 -0.285661 -0.2523 -0.222225 -0.187124 -0.171235 -0.138967 -0.08999  
-0.818705 -0.453815 -0.288609 -0.259603 -0.202881 -0.180297 -0.159103 -0.118635 -0.098445  
-0.584077 -0.396309 -0.288493 -0.261776 -0.229219 -0.16753 -0.152033 -0.121239 -0.085567

|           |           |           |           |           |           |           |           |           |
|-----------|-----------|-----------|-----------|-----------|-----------|-----------|-----------|-----------|
| -0.575096 | -0.386978 | -0.303512 | -0.277199 | -0.238629 | -0.173802 | -0.159803 | -0.115852 | -0.087895 |
| -0.764008 | -0.453209 | -0.287029 | -0.243056 | -0.220407 | -0.196474 | -0.157468 | -0.130934 | -0.102924 |
| -0.8017   | -0.469444 | -0.291658 | -0.248772 | -0.216593 | -0.19379  | -0.158347 | -0.130037 | -0.113907 |
| -0.594231 | -0.415768 | -0.272797 | -0.246546 | -0.229184 | -0.182653 | -0.165422 | -0.10692  | -0.096524 |
| -0.58393  | -0.406807 | -0.289745 | -0.241887 | -0.231907 | -0.187322 | -0.168516 | -0.103164 | -0.096579 |
| -0.639955 | -0.550987 | -0.288189 | -0.257707 | -0.224045 | -0.2195   | -0.191211 | -0.162555 | -0.085706 |
| -0.609573 | -0.513447 | -0.253757 | -0.241205 | -0.200195 | -0.18697  | -0.165239 | -0.153162 | -0.093466 |
| -0.72005  | -0.405215 | -0.286826 | -0.247294 | -0.217481 | -0.20929  | -0.181663 | -0.133157 | -0.081606 |
| -0.6147   | -0.402661 | -0.364857 | -0.251135 | -0.232895 | -0.169531 | -0.152332 | -0.128713 | -0.085271 |
| -0.639258 | -0.536908 | -0.316647 | -0.28683  | -0.23707  | -0.225953 | -0.19394  | -0.134422 | -0.094056 |
| -0.6165   | -0.532032 | -0.273888 | -0.23223  | -0.209137 | -0.203661 | -0.169969 | -0.133706 | -0.10045  |
| -0.602263 | -0.395458 | -0.275583 | -0.270211 | -0.222566 | -0.192286 | -0.161632 | -0.115435 | -0.093849 |
| -0.752132 | -0.415672 | -0.298598 | -0.260212 | -0.236051 | -0.189404 | -0.155533 | -0.123039 | -0.089763 |

|          |          |          |          |          |          |          |          |          |
|----------|----------|----------|----------|----------|----------|----------|----------|----------|
| 1.917329 | 2.088611 | 2.2478   | 2.250187 | 2.435603 | 2.657241 | 2.77107  | 2.847905 | 2.945855 |
| 1.713055 | 2.095791 | 2.244028 | 2.308197 | 2.393276 | 2.462081 | 2.669383 | 2.769723 | 2.859167 |
| 2.062404 | 2.101874 | 2.283982 | 2.503799 | 2.700339 | 2.764641 | 2.928571 | 3.070548 | 3.314388 |
| 2.071703 | 2.107255 | 2.391876 | 2.56266  | 2.733711 | 2.824179 | 2.885515 | 3.078616 | 3.396197 |
| 2.052615 | 2.190163 | 2.322153 | 2.60778  | 2.762743 | 2.814776 | 3.038101 | 3.145137 | 3.460644 |
| 2.079559 | 2.190755 | 2.305955 | 2.507454 | 2.696878 | 2.786433 | 2.919545 | 3.120955 | 3.149214 |

|          |          |          |          |          |          |          |          |          |
|----------|----------|----------|----------|----------|----------|----------|----------|----------|
| 2.035089 | 2.177721 | 2.347275 | 2.663333 | 2.701927 | 2.795191 | 2.982105 | 3.137045 | 3.408392 |
| 2.042579 | 2.150401 | 2.263226 | 2.498999 | 2.707063 | 2.798267 | 2.935077 | 3.035321 | 3.079291 |
| 2.06007  | 2.125342 | 2.324243 | 2.637728 | 2.726767 | 2.831982 | 2.948629 | 3.080617 | 3.498638 |
| 2.042579 | 2.150401 | 2.263226 | 2.498999 | 2.707063 | 2.798267 | 2.935077 | 3.035321 | 3.079291 |

|          |          |          |          |          |          |          |          |          |
|----------|----------|----------|----------|----------|----------|----------|----------|----------|
| 2.022843 | 2.229285 | 2.334362 | 2.403206 | 2.533922 | 2.620802 | 2.76317  | 2.922434 | 3.1712   |
| 1.959902 | 2.200286 | 2.36346  | 2.401037 | 2.50108  | 2.515557 | 2.615344 | 2.849543 | 3.115769 |
| 2.147752 | 2.256565 | 2.332753 | 2.374964 | 2.435333 | 2.592778 | 2.757283 | 2.789001 | 3.136223 |
| 2.034281 | 2.218085 | 2.315405 | 2.408614 | 2.441445 | 2.526109 | 2.602359 | 2.806149 | 2.860535 |

|          |          |          |          |          |          |          |          |          |
|----------|----------|----------|----------|----------|----------|----------|----------|----------|
| 2.087649 | 2.241214 | 2.292055 | 2.358805 | 2.466025 | 2.581567 | 2.705981 | 2.780243 | 3.100711 |
| 2.038715 | 2.181434 | 2.22078  | 2.354295 | 2.500344 | 2.533338 | 2.741711 | 2.748998 | 3.02547  |
| 2.072084 | 2.103657 | 2.221242 | 2.415163 | 2.498214 | 2.594005 | 2.639434 | 2.772879 | 3.123773 |
| 2.053309 | 2.099366 | 2.171775 | 2.310967 | 2.476565 | 2.556792 | 2.605848 | 2.689405 | 2.8448   |

|          |          |          |          |          |          |          |          |          |
|----------|----------|----------|----------|----------|----------|----------|----------|----------|
| 2.103024 | 2.227635 | 2.335567 | 2.679872 | 2.720235 | 2.813213 | 3.033342 | 3.170065 | 3.25776  |
| 2.097926 | 2.234718 | 2.394543 | 2.651256 | 2.735906 | 2.808744 | 2.944488 | 3.087123 | 3.283107 |
| 2.137398 | 2.27469  | 2.322108 | 2.413684 | 2.651555 | 2.711208 | 2.788849 | 3.038463 | 3.37765  |
| 2.099826 | 2.245825 | 2.276017 | 2.387104 | 2.64781  | 2.723487 | 2.783885 | 2.88755  | 3.283317 |
| 2.097719 | 2.160931 | 2.331146 | 2.622521 | 2.712634 | 2.816306 | 2.937927 | 3.216988 | 3.311621 |
| 2.075971 | 2.181731 | 2.327766 | 2.680854 | 2.717851 | 2.805427 | 2.930813 | 2.984762 | 3.355278 |
| 2.111688 | 2.171977 | 2.281688 | 2.369247 | 2.636301 | 2.687057 | 2.716565 | 2.815618 | 3.149917 |
| 2.107181 | 2.271369 | 2.317856 | 2.351877 | 2.57742  | 2.694237 | 2.722778 | 2.869196 | 3.260642 |

|           |           |           |           |           |           |           |           |           |
|-----------|-----------|-----------|-----------|-----------|-----------|-----------|-----------|-----------|
| -0.094777 | -0.078821 | -0.066547 | -0.066379 | -0.054613 | -0.04335  | -0.038532 | -0.035595 | -0.032183 |
| -0.118525 | -0.078219 | -0.066813 | -0.062435 | -0.05709  | -0.05312  | -0.042808 | -0.038585 | -0.035185 |
| -0.081063 | -0.077712 | -0.06405  | -0.050854 | -0.041456 | -0.038789 | -0.032759 | -0.028319 | -0.022076 |
| -0.08026  | -0.077267 | -0.057174 | -0.047827 | -0.040049 | -0.036477 | -0.034243 | -0.028086 | -0.020312 |
| -0.081918 | -0.070739 | -0.061523 | -0.045634 | -0.038865 | -0.036832 | -0.029276 | -0.026238 | -0.019024 |
| -0.079588 | -0.070694 | -0.062583 | -0.050661 | -0.041605 | -0.037925 | -0.033065 | -0.026895 | -0.026129 |
| -0.083473 | -0.07168  | -0.059918 | -0.043077 | -0.041388 | -0.037584 | -0.031007 | -0.026456 | -0.020061 |
| -0.082804 | -0.073793 | -0.06547  | -0.05111  | -0.041169 | -0.037465 | -0.032541 | -0.029359 | -0.028066 |
| -0.081266 | -0.07579  | -0.061388 | -0.044237 | -0.040338 | -0.036184 | -0.032091 | -0.028028 | -0.018303 |
| -0.082804 | -0.073793 | -0.06547  | -0.05111  | -0.041169 | -0.037465 | -0.032541 | -0.029359 | -0.028066 |
| -0.084578 | -0.067864 | -0.060737 | -0.056499 | -0.049281 | -0.045021 | -0.038848 | -0.032967 | -0.025548 |
| -0.09051  | -0.069983 | -0.058906 | -0.056627 | -0.050999 | -0.050234 | -0.045277 | -0.035535 | -0.027038 |
| -0.074002 | -0.065933 | -0.06084  | -0.058199 | -0.054628 | -0.046352 | -0.039085 | -0.037825 | -0.026478 |

-0.083545 -0.068674 -0.061962 -0.056179 -0.05428 -0.049684 -0.045892 -0.037161 -0.035135  
-0.078902 -0.067012 -0.063507 -0.059195 -0.052901 -0.046895 -0.041215 -0.038168 -0.027458  
-0.083148 -0.071398 -0.068478 -0.059477 -0.051038 -0.049311 -0.039719 -0.039421 -0.029657  
-0.080227 -0.077564 -0.068445 -0.055795 -0.051152 -0.046293 -0.044158 -0.03846 -0.026817  
-0.081857 -0.07792 -0.072134 -0.062253 -0.052322 -0.04812 -0.045726 -0.041929 -0.035709

-0.077617 -0.067983 -0.06066 -0.042345 -0.040611 -0.036891 -0.029419 -0.025578 -0.023387  
-0.07804 -0.067475 -0.057015 -0.04362 -0.039958 -0.037062 -0.032228 -0.027842 -0.022791  
-0.074822 -0.064682 -0.061526 -0.055881 -0.043607 -0.040992 -0.037831 -0.029265 -0.020699  
-0.077882 -0.066686 -0.064591 -0.057462 -0.043776 -0.040475 -0.038025 -0.034171 -0.022786  
-0.078058 -0.072971 -0.060943 -0.044941 -0.040932 -0.036774 -0.032446 -0.024381 -0.022138  
-0.079894 -0.071375 -0.061161 -0.042302 -0.040712 -0.037189 -0.032684 -0.030922 -0.021175  
-0.076902 -0.072119 -0.064206 -0.058549 -0.044302 -0.042031 -0.040766 -0.0368 -0.02611  
-0.077273 -0.064909 -0.061803 -0.059628 -0.047098 -0.041719 -0.040504 -0.034823 -0.023319

|          |          |          |          |          |          |          |          |          |
|----------|----------|----------|----------|----------|----------|----------|----------|----------|
| 3.140045 | 3.433466 | 3.632053 | 3.680924 | 3.719037 | 3.73316  | 3.969542 | 4.042894 | 4.182568 |
| 3.136013 | 3.429007 | 3.676952 | 3.712832 | 3.721816 | 3.839129 | 3.989715 | 4.054903 | 4.187056 |
| 3.390894 | 3.580125 | 3.664288 | 3.735508 | 3.763507 | 3.864896 | 4.034493 | 4.225645 | 4.303481 |
| 3.583654 | 3.66864  | 3.701904 | 3.782396 | 3.855569 | 4.019946 | 4.199575 | 4.313003 | 4.49102  |
| 3.619724 | 3.708502 | 3.729431 | 3.774849 | 3.867547 | 4.021893 | 4.197317 | 4.287518 | 4.425835 |
| 3.536143 | 3.660978 | 3.682871 | 3.735242 | 3.760083 | 3.964497 | 4.203032 | 4.281925 | 4.303213 |

|          |          |          |          |          |          |          |          |          |
|----------|----------|----------|----------|----------|----------|----------|----------|----------|
| 3.610398 | 3.637555 | 3.71317  | 3.761211 | 3.873902 | 4.01501  | 4.197329 | 4.282073 | 4.492293 |
| 3.455271 | 3.574865 | 3.676242 | 3.714058 | 3.748065 | 3.922904 | 4.208897 | 4.280848 | 4.326475 |
| 3.595648 | 3.702137 | 3.706551 | 3.782535 | 3.821708 | 4.011567 | 4.197278 | 4.30285  | 4.429055 |
| 3.455271 | 3.574865 | 3.676242 | 3.714058 | 3.748065 | 3.922904 | 4.208897 | 4.280848 | 4.326475 |

|          |          |          |          |          |          |          |          |          |
|----------|----------|----------|----------|----------|----------|----------|----------|----------|
| 3.431783 | 3.555686 | 3.673939 | 3.740198 | 3.753687 | 3.906185 | 3.976587 | 4.173027 | 4.21476  |
| 3.372105 | 3.565508 | 3.672865 | 3.701817 | 3.763494 | 3.991345 | 4.203601 | 4.294998 | 4.412971 |
| 3.33852  | 3.416893 | 3.687335 | 3.741531 | 3.779654 | 3.881518 | 4.045504 | 4.20004  | 4.297881 |
| 3.342443 | 3.551726 | 3.687874 | 3.747052 | 3.874755 | 3.932986 | 4.208293 | 4.252956 | 4.287505 |

|          |          |          |          |          |          |          |          |          |
|----------|----------|----------|----------|----------|----------|----------|----------|----------|
| 3.374264 | 3.621996 | 3.689243 | 3.735418 | 3.771418 | 3.991736 | 4.102427 | 4.206047 | 4.333455 |
| 3.347324 | 3.51455  | 3.679926 | 3.752215 | 3.765356 | 4.061502 | 4.201437 | 4.283393 | 4.362368 |
| 3.240158 | 3.414988 | 3.681557 | 3.746767 | 3.770695 | 3.911138 | 4.088377 | 4.209728 | 4.29635  |
| 3.292755 | 3.494552 | 3.698777 | 3.755995 | 3.842334 | 4.132464 | 4.213095 | 4.261563 | 4.326051 |

|          |          |          |          |          |          |          |          |          |
|----------|----------|----------|----------|----------|----------|----------|----------|----------|
| 3.573971 | 3.686973 | 3.68875  | 3.736409 | 3.790135 | 3.989053 | 4.250104 | 4.252901 | 4.323377 |
| 3.594185 | 3.699409 | 3.726572 | 3.736932 | 3.779145 | 4.231476 | 4.244244 | 4.270868 | 4.387465 |
| 3.541033 | 3.603581 | 3.706893 | 3.733159 | 3.858399 | 3.971511 | 4.194621 | 4.21957  | 4.281417 |
| 3.364719 | 3.501423 | 3.701642 | 3.748622 | 3.784353 | 4.044475 | 4.203094 | 4.260928 | 4.292459 |
| 3.508344 | 3.667607 | 3.701062 | 3.748873 | 3.794484 | 3.943568 | 4.246316 | 4.27874  | 4.365929 |
| 3.432221 | 3.648351 | 3.71137  | 3.722419 | 3.732328 | 4.231145 | 4.258932 | 4.296815 | 4.392021 |
| 3.334139 | 3.462208 | 3.699161 | 3.746996 | 3.774408 | 4.141708 | 4.206402 | 4.277102 | 4.298996 |
| 3.467626 | 3.676284 | 3.698367 | 3.726279 | 3.804645 | 4.165564 | 4.225498 | 4.300838 | 4.31364  |

|           |           |           |           |           |           |           |           |           |
|-----------|-----------|-----------|-----------|-----------|-----------|-----------|-----------|-----------|
| -0.026375 | -0.019556 | -0.015986 | -0.015214 | -0.014638 | -0.01443  | -0.011363 | -0.010552 | -0.009166 |
| -0.026484 | -0.019645 | -0.015275 | -0.01473  | -0.014597 | -0.012963 | -0.011134 | -0.010425 | -0.009125 |
| -0.020422 | -0.016851 | -0.015473 | -0.014396 | -0.013994 | -0.01263  | -0.010642 | -0.008777 | -0.008115 |
| -0.01679  | -0.015405 | -0.014894 | -0.013729 | -0.01275  | -0.0108   | -0.00901  | -0.008038 | -0.00672  |
| -0.016187 | -0.014795 | -0.014485 | -0.013834 | -0.012596 | -0.010778 | -0.009031 | -0.008247 | -0.007175 |
| -0.01762  | -0.015525 | -0.015184 | -0.0144   | -0.014042 | -0.011421 | -0.008979 | -0.008293 | -0.008117 |
| -0.016341 | -0.015897 | -0.014725 | -0.014026 | -0.012516 | -0.010854 | -0.009031 | -0.008292 | -0.006711 |
| -0.019128 | -0.016941 | -0.015286 | -0.014712 | -0.014214 | -0.011911 | -0.008926 | -0.008302 | -0.007929 |
| -0.016587 | -0.014891 | -0.014824 | -0.013727 | -0.013194 | -0.010891 | -0.009031 | -0.00812  | -0.007152 |
| -0.019128 | -0.016941 | -0.015286 | -0.014712 | -0.014214 | -0.011911 | -0.008926 | -0.008302 | -0.007929 |
| -0.01959  | -0.017274 | -0.015322 | -0.014328 | -0.014134 | -0.012114 | -0.011283 | -0.009255 | -0.008874 |
| -0.020816 | -0.017102 | -0.015339 | -0.014896 | -0.013994 | -0.011116 | -0.008974 | -0.008185 | -0.007268 |
| -0.02154  | -0.019889 | -0.015116 | -0.014309 | -0.013767 | -0.01242  | -0.010525 | -0.009006 | -0.008161 |

-0.021454 -0.017343 -0.015107 -0.014229 -0.012505 -0.011791 -0.008932 -0.008539 -0.008247  
-0.02077 -0.01615 -0.015086 -0.014397 -0.013882 -0.011111 -0.009937 -0.008952 -0.007874  
-0.021348 -0.01801 -0.015229 -0.014155 -0.013968 -0.010356 -0.008994 -0.008281 -0.007648  
-0.023811 -0.019927 -0.015204 -0.014233 -0.013892 -0.012054 -0.010079 -0.008919 -0.008174  
-0.022568 -0.018379 -0.014941 -0.014101 -0.012922 -0.009641 -0.008889 -0.008465 -0.007933

-0.016956 -0.015121 -0.015094 -0.014383 -0.013622 -0.011142 -0.008563 -0.008539 -0.007954  
-0.016612 -0.014932 -0.014527 -0.014375 -0.013774 -0.008725 -0.008614 -0.008386 -0.007457  
-0.017532 -0.016454 -0.014819 -0.01443 -0.012713 -0.011341 -0.009056 -0.008831 -0.008297  
-0.020973 -0.018252 -0.014898 -0.014206 -0.013702 -0.010536 -0.008979 -0.00847 -0.008206  
-0.018124 -0.015421 -0.014907 -0.014203 -0.013562 -0.011665 -0.008596 -0.00832 -0.007621  
-0.019581 -0.015724 -0.014752 -0.014588 -0.014442 -0.008728 -0.008487 -0.00817 -0.007423  
-0.021636 -0.018993 -0.014936 -0.01423 -0.01384 -0.009552 -0.008949 -0.008334 -0.008152  
-0.018889 -0.015286 -0.014948 -0.014531 -0.013423 -0.009325 -0.008778 -0.008137 -0.008033



|          |          |          |          |          |          |          |          |          |
|----------|----------|----------|----------|----------|----------|----------|----------|----------|
| 4.28453  | 4.571684 | 4.592437 | 4.625042 | 4.810785 | 4.864054 | 4.9633   | 5.048729 | 5.097172 |
| 4.286145 | 4.583525 | 4.599223 | 4.616194 | 4.807584 | 4.965689 | 4.996616 | 5.051152 | 5.248514 |
| 4.461847 | 4.537901 | 4.61026  | 4.68241  | 4.844566 | 4.909666 | 5.056249 | 5.072731 | 5.184207 |
| 4.569364 | 4.688775 | 4.719726 | 4.766277 | 4.9316   | 4.94635  | 5.037109 | 5.058545 | 5.208112 |
| 4.597369 | 4.705273 | 4.776929 | 4.798991 | 4.865934 | 4.915502 | 4.926878 | 5.072733 | 5.119373 |
| 4.448343 | 4.601498 | 4.622871 | 4.702486 | 4.78684  | 4.916503 | 4.976636 | 5.070758 | 5.142963 |

|          |          |          |          |          |          |          |          |          |
|----------|----------|----------|----------|----------|----------|----------|----------|----------|
| 4.608334 | 4.696602 | 4.733156 | 4.804755 | 4.900333 | 4.920786 | 5.025059 | 5.064449 | 5.137098 |
| 4.434265 | 4.543818 | 4.614954 | 4.692786 | 4.784015 | 4.911174 | 5.021647 | 5.062264 | 5.142616 |
| 4.563407 | 4.694449 | 4.73518  | 4.769803 | 4.810371 | 4.936758 | 4.992532 | 5.043676 | 5.235062 |
| 4.434265 | 4.543818 | 4.614954 | 4.692786 | 4.784015 | 4.911174 | 5.021647 | 5.062264 | 5.142616 |

|          |          |          |          |          |          |          |          |          |
|----------|----------|----------|----------|----------|----------|----------|----------|----------|
| 4.332148 | 4.399482 | 4.708832 | 4.797398 | 4.901056 | 4.936706 | 4.948346 | 5.116128 | 5.221024 |
| 4.425367 | 4.711831 | 4.812281 | 4.891463 | 4.922202 | 4.965029 | 5.032074 | 5.204847 | 5.272727 |
| 4.308429 | 4.409202 | 4.781048 | 4.824401 | 4.942287 | 4.948376 | 4.960093 | 5.06858  | 5.208715 |
| 4.345262 | 4.681475 | 4.801567 | 4.864687 | 4.929138 | 4.961085 | 5.040805 | 5.090279 | 5.278458 |

|          |          |          |          |          |          |          |          |          |
|----------|----------|----------|----------|----------|----------|----------|----------|----------|
| 4.352414 | 4.487937 | 4.804688 | 4.906788 | 4.924106 | 4.936815 | 4.956972 | 5.10601  | 5.199075 |
| 4.43254  | 4.696789 | 4.812287 | 4.903547 | 4.921821 | 4.964115 | 5.095592 | 5.150049 | 5.264753 |
| 4.366161 | 4.434436 | 4.781016 | 4.830745 | 4.901318 | 4.941324 | 4.953098 | 5.12436  | 5.307197 |
| 4.375014 | 4.677364 | 4.803096 | 4.881445 | 4.933261 | 4.959801 | 5.113438 | 5.181631 | 5.293255 |

|          |          |          |          |          |          |          |          |          |
|----------|----------|----------|----------|----------|----------|----------|----------|----------|
| 4.382598 | 4.463731 | 4.654399 | 4.743377 | 4.868906 | 4.882303 | 5.014087 | 5.063496 | 5.228212 |
| 4.433028 | 4.556198 | 4.676315 | 4.829778 | 4.892372 | 4.899266 | 5.034055 | 5.061196 | 5.225593 |
| 4.30223  | 4.402185 | 4.723353 | 4.77126  | 4.875485 | 4.900255 | 4.999758 | 5.045746 | 5.239779 |
| 4.422838 | 4.493894 | 4.702577 | 4.764185 | 4.890802 | 4.928062 | 4.994925 | 5.018374 | 5.262917 |
| 4.435053 | 4.533799 | 4.674592 | 4.835333 | 4.894549 | 4.958898 | 5.058248 | 5.202708 | 5.341629 |
| 4.475271 | 4.541531 | 4.670276 | 4.823281 | 4.893896 | 4.939147 | 5.058996 | 5.146099 | 5.311769 |
| 4.441173 | 4.520223 | 4.704816 | 4.868135 | 4.889774 | 4.910716 | 5.020024 | 5.16656  | 5.283071 |
| 4.379562 | 4.57     | 4.730078 | 4.833139 | 4.903651 | 4.910019 | 4.990848 | 5.192906 | 5.333172 |

|           |           |           |           |           |           |           |           |           |
|-----------|-----------|-----------|-----------|-----------|-----------|-----------|-----------|-----------|
| -0.008271 | -0.006196 | -0.006068 | -0.005873 | -0.004873 | -0.004619 | -0.004181 | -0.003838 | -0.003656 |
| -0.008258 | -0.006123 | -0.006027 | -0.005925 | -0.004889 | -0.004171 | -0.004044 | -0.003828 | -0.003141 |
| -0.00692  | -0.00641  | -0.00596  | -0.005544 | -0.00471  | -0.004412 | -0.003809 | -0.003746 | -0.00335  |
| -0.006211 | -0.005508 | -0.00534  | -0.005096 | -0.004316 | -0.004253 | -0.003883 | -0.0038   | -0.003271 |
| -0.006038 | -0.005418 | -0.005042 | -0.004931 | -0.004611 | -0.004387 | -0.004337 | -0.003746 | -0.003575 |
| -0.007014 | -0.006013 | -0.005885 | -0.005433 | -0.004992 | -0.004382 | -0.004126 | -0.003754 | -0.003492 |
| -0.005972 | -0.005465 | -0.005268 | -0.004903 | -0.004454 | -0.004364 | -0.00393  | -0.003778 | -0.003512 |
| -0.007114 | -0.006372 | -0.005932 | -0.005486 | -0.005006 | -0.004406 | -0.003943 | -0.003786 | -0.003493 |
| -0.006248 | -0.005477 | -0.005257 | -0.005078 | -0.004875 | -0.004294 | -0.00406  | -0.003857 | -0.003184 |
| -0.007114 | -0.006372 | -0.005932 | -0.005486 | -0.005006 | -0.004406 | -0.003943 | -0.003786 | -0.003493 |
| -0.007884 | -0.007368 | -0.005398 | -0.004939 | -0.004451 | -0.004294 | -0.004244 | -0.003587 | -0.003229 |
| -0.007178 | -0.005382 | -0.004866 | -0.004494 | -0.004357 | -0.004174 | -0.003902 | -0.003282 | -0.003066 |
| -0.008075 | -0.007296 | -0.005021 | -0.004807 | -0.00427  | -0.004244 | -0.004195 | -0.003762 | -0.003269 |

-0.007781 -0.005549 -0.004918 -0.004616 -0.004327 -0.004191 -0.003868 -0.003681 -0.003048  
-0.007725 -0.00674 -0.004903 -0.004425 -0.004349 -0.004294 -0.004208 -0.003623 -0.003301  
-0.007127 -0.005464 -0.004866 -0.00444 -0.004359 -0.004178 -0.003662 -0.003467 -0.00309  
-0.007619 -0.007113 -0.005021 -0.004776 -0.00445 -0.004275 -0.004224 -0.003557 -0.002961  
-0.007551 -0.005572 -0.004911 -0.004539 -0.004309 -0.004196 -0.003597 -0.003359 -0.003003  
  
-0.007494 -0.006907 -0.005702 -0.005214 -0.004597 -0.004535 -0.003974 -0.003781 -0.003206  
-0.007123 -0.006293 -0.005578 -0.004781 -0.00449 -0.004459 -0.003895 -0.00379 -0.003214  
-0.008125 -0.007348 -0.00532 -0.00507 -0.004567 -0.004454 -0.004031 -0.003849 -0.003169  
-0.007197 -0.0067 -0.005432 -0.005106 -0.004497 -0.004332 -0.004051 -0.003956 -0.003096  
-0.007109 -0.006437 -0.005587 -0.004754 -0.00448 -0.0042 -0.003801 -0.003289 -0.002861  
-0.006827 -0.006387 -0.005612 -0.004812 -0.004483 -0.004284 -0.003798 -0.003481 -0.002948  
-0.007065 -0.006525 -0.00542 -0.0046 -0.004501 -0.004408 -0.00395 -0.00341 -0.003034  
-0.007517 -0.006207 -0.005284 -0.004765 -0.004439 -0.004411 -0.004067 -0.003321 -0.002885

|          |          |          |          |          |          |          |          |          |
|----------|----------|----------|----------|----------|----------|----------|----------|----------|
| 5.298768 | 5.343702 | 5.466105 | 5.618957 | 5.658679 | 5.733161 | 5.909908 | 6.119667 | 6.156662 |
| 5.29736  | 5.37654  | 5.46422  | 5.615957 | 5.675271 | 5.72916  | 5.895603 | 6.118051 | 6.135225 |
| 5.337376 | 5.439468 | 5.484021 | 5.670519 | 5.741193 | 5.796288 | 5.845134 | 5.947927 | 6.037716 |
| 5.333003 | 5.425072 | 5.51823  | 5.56133  | 5.670904 | 5.725009 | 5.752062 | 5.941105 | 5.977483 |
| 5.264734 | 5.365054 | 5.413203 | 5.571696 | 5.659063 | 5.705156 | 5.77175  | 5.949865 | 6.006927 |
| 5.185501 | 5.38922  | 5.490336 | 5.6063   | 5.706808 | 5.775687 | 5.833815 | 5.917922 | 5.989736 |

|          |          |          |          |          |          |          |          |          |
|----------|----------|----------|----------|----------|----------|----------|----------|----------|
| 5.314033 | 5.414142 | 5.47616  | 5.572236 | 5.666872 | 5.724176 | 5.760928 | 5.95556  | 6.018726 |
| 5.268899 | 5.435351 | 5.495532 | 5.611677 | 5.733351 | 5.766512 | 5.845818 | 5.923463 | 5.995384 |
| 5.251118 | 5.372004 | 5.411455 | 5.547782 | 5.677421 | 5.731449 | 5.741798 | 5.901554 | 5.972546 |
| 5.268899 | 5.435351 | 5.495532 | 5.611677 | 5.733351 | 5.766512 | 5.845818 | 5.923463 | 5.995384 |

|          |          |          |          |          |          |          |          |          |
|----------|----------|----------|----------|----------|----------|----------|----------|----------|
| 5.307301 | 5.484844 | 5.562695 | 5.598542 | 5.688637 | 5.793814 | 5.938975 | 6.015572 | 6.054244 |
| 5.436141 | 5.534071 | 5.616954 | 5.647579 | 5.747869 | 5.785978 | 5.940435 | 5.962503 | 6.028972 |
| 5.297185 | 5.392875 | 5.546223 | 5.647523 | 5.718915 | 5.793401 | 5.984914 | 6.014122 | 6.052808 |
| 5.325755 | 5.38078  | 5.582728 | 5.679864 | 5.770701 | 5.818109 | 5.884566 | 5.996093 | 5.999224 |

|          |          |          |          |          |          |          |          |          |
|----------|----------|----------|----------|----------|----------|----------|----------|----------|
| 5.317224 | 5.43674  | 5.536983 | 5.618094 | 5.73836  | 5.816978 | 5.846042 | 5.983984 | 6.015594 |
| 5.392403 | 5.449569 | 5.60872  | 5.668918 | 5.773563 | 5.824684 | 5.941339 | 5.974108 | 6.00309  |
| 5.315297 | 5.500462 | 5.590628 | 5.677286 | 5.697667 | 5.786626 | 5.957858 | 6.019389 | 6.086921 |
| 5.302713 | 5.508111 | 5.585172 | 5.679117 | 5.755171 | 5.803174 | 5.928506 | 5.994708 | 6.075206 |

|          |          |          |          |          |          |          |          |          |
|----------|----------|----------|----------|----------|----------|----------|----------|----------|
| 5.313958 | 5.472799 | 5.543877 | 5.682873 | 5.74877  | 5.875802 | 6.032368 | 6.150261 | 6.208058 |
| 5.383895 | 5.514113 | 5.562433 | 5.690224 | 5.756824 | 5.854049 | 5.994299 | 6.095257 | 6.161238 |
| 5.321555 | 5.437776 | 5.505716 | 5.650063 | 5.744989 | 5.824883 | 6.055152 | 6.105219 | 6.151656 |
| 5.293581 | 5.468272 | 5.556686 | 5.648913 | 5.738204 | 5.820307 | 6.057475 | 6.110561 | 6.153553 |
| 5.423999 | 5.517568 | 5.649176 | 5.688277 | 5.761043 | 5.851553 | 6.006175 | 6.064199 | 6.199026 |
| 5.442374 | 5.512263 | 5.660246 | 5.717773 | 5.763148 | 5.902029 | 5.952488 | 6.015039 | 6.184999 |
| 5.419933 | 5.459089 | 5.550278 | 5.656102 | 5.747158 | 5.815564 | 5.997476 | 6.079167 | 6.148785 |
| 5.364518 | 5.456347 | 5.642625 | 5.658348 | 5.762411 | 5.842189 | 5.987306 | 6.087428 | 6.139526 |

|           |           |           |           |           |           |           |           |           |
|-----------|-----------|-----------|-----------|-----------|-----------|-----------|-----------|-----------|
| -0.002987 | -0.002855 | -0.002525 | -0.002167 | -0.002082 | -0.001933 | -0.001619 | -0.001312 | -0.001265 |
| -0.002991 | -0.002763 | -0.00253  | -0.002173 | -0.002048 | -0.00194  | -0.001642 | -0.001315 | -0.001292 |
| -0.002873 | -0.002594 | -0.002481 | -0.002058 | -0.001917 | -0.001814 | -0.001728 | -0.001559 | -0.001425 |
| -0.002886 | -0.002631 | -0.002397 | -0.002296 | -0.002057 | -0.001948 | -0.001896 | -0.001569 | -0.001513 |
| -0.00309  | -0.002795 | -0.002663 | -0.002272 | -0.002082 | -0.001988 | -0.001859 | -0.001556 | -0.001469 |
| -0.003346 | -0.002728 | -0.002465 | -0.002194 | -0.001984 | -0.001852 | -0.001747 | -0.001606 | -0.001495 |
| -0.002941 | -0.00266  | -0.0025   | -0.002271 | -0.002065 | -0.00195  | -0.00188  | -0.001547 | -0.001452 |
| -0.003077 | -0.002605 | -0.002452 | -0.002183 | -0.001932 | -0.001869 | -0.001726 | -0.001597 | -0.001486 |
| -0.003133 | -0.002775 | -0.002668 | -0.002327 | -0.002044 | -0.001936 | -0.001916 | -0.001633 | -0.001521 |
| -0.003077 | -0.002605 | -0.002452 | -0.002183 | -0.001932 | -0.001869 | -0.001726 | -0.001597 | -0.001486 |
| -0.002961 | -0.002478 | -0.002292 | -0.002212 | -0.002021 | -0.001819 | -0.001573 | -0.001457 | -0.001401 |
| -0.002602 | -0.002359 | -0.002171 | -0.002106 | -0.001904 | -0.001833 | -0.00157  | -0.001536 | -0.001437 |
| -0.002991 | -0.002718 | -0.002331 | -0.002106 | -0.00196  | -0.001819 | -0.001502 | -0.001459 | -0.001403 |

-0.002907 -0.002751 -0.002247 -0.002039 -0.001861 -0.001775 -0.001661 -0.001485 -0.001481  
-0.002932 -0.002601 -0.002352 -0.002169 -0.001923 -0.001777 -0.001726 -0.001503 -0.001456  
-0.002719 -0.002568 -0.002189 -0.002061 -0.001856 -0.001763 -0.001569 -0.001518 -0.001475  
-0.002938 -0.00244 -0.002229 -0.002044 -0.002003 -0.001832 -0.001543 -0.001451 -0.001356  
-0.002975 -0.002421 -0.002241 -0.00204 -0.00189 -0.001802 -0.001589 -0.001487 -0.001372

-0.002941 -0.002509 -0.002336 -0.002032 -0.001903 -0.001675 -0.001432 -0.001273 -0.001201  
-0.002742 -0.002407 -0.002293 -0.002018 -0.001887 -0.001712 -0.001488 -0.001345 -0.001259  
-0.002919 -0.002598 -0.002427 -0.0021 -0.00191 -0.001763 -0.0014 -0.001331 -0.001271  
-0.003002 -0.00252 -0.002306 -0.002103 -0.001923 -0.001771 -0.001397 -0.001324 -0.001269  
-0.002634 -0.002399 -0.002102 -0.002021 -0.001879 -0.001717 -0.00147 -0.001387 -0.001212  
-0.002586 -0.002411 -0.002079 -0.001963 -0.001875 -0.001632 -0.001551 -0.001457 -0.001229  
-0.002645 -0.002543 -0.002321 -0.002088 -0.001906 -0.00178 -0.001483 -0.001367 -0.001275  
-0.002796 -0.00255 -0.002116 -0.002083 -0.001877 -0.001733 -0.001498 -0.001355 -0.001287

|          |          |          |          |          |          |          |          |          |
|----------|----------|----------|----------|----------|----------|----------|----------|----------|
| 6.222595 | 6.463156 | 6.565281 | 6.653336 | 6.728408 | 6.749733 | 6.796002 | 6.830923 | 7.09293  |
| 6.21886  | 6.453008 | 6.588898 | 6.633649 | 6.724065 | 6.76016  | 6.794896 | 6.885738 | 7.008966 |
| 6.104984 | 6.263571 | 6.350637 | 6.433286 | 6.611952 | 6.623257 | 6.656752 | 6.775875 | 6.940346 |
| 6.069789 | 6.170541 | 6.298997 | 6.39964  | 6.481821 | 6.66418  | 6.705261 | 6.793198 | 6.936182 |
| 6.043684 | 6.117318 | 6.251378 | 6.348178 | 6.452431 | 6.634287 | 6.721182 | 6.752447 | 6.865256 |
| 6.042557 | 6.203904 | 6.285676 | 6.378745 | 6.516064 | 6.55876  | 6.750472 | 6.771012 | 6.887688 |

|          |          |          |          |          |          |          |          |          |
|----------|----------|----------|----------|----------|----------|----------|----------|----------|
| 6.117195 | 6.160267 | 6.281415 | 6.376927 | 6.473146 | 6.656624 | 6.677744 | 6.758673 | 6.934762 |
| 6.196622 | 6.248432 | 6.402719 | 6.426326 | 6.534513 | 6.620874 | 6.67913  | 6.758553 | 6.929536 |
| 6.036367 | 6.107837 | 6.263934 | 6.330109 | 6.442288 | 6.603138 | 6.719723 | 6.762914 | 6.895464 |
| 6.196622 | 6.248432 | 6.402719 | 6.426326 | 6.534513 | 6.620874 | 6.67913  | 6.758553 | 6.929536 |

|          |          |          |          |          |          |          |          |          |
|----------|----------|----------|----------|----------|----------|----------|----------|----------|
| 6.162377 | 6.31035  | 6.415682 | 6.497749 | 6.582065 | 6.700015 | 6.740384 | 6.890995 | 6.922845 |
| 6.16376  | 6.309299 | 6.472017 | 6.528493 | 6.660818 | 6.694821 | 6.817713 | 6.899063 | 6.933379 |
| 6.11079  | 6.280534 | 6.36707  | 6.499086 | 6.563601 | 6.707303 | 6.811439 | 6.897928 | 6.928926 |
| 6.119955 | 6.325854 | 6.351336 | 6.481246 | 6.62533  | 6.682164 | 6.805768 | 6.899    | 6.912913 |

|          |          |          |          |          |          |          |          |          |
|----------|----------|----------|----------|----------|----------|----------|----------|----------|
| 6.14803  | 6.293334 | 6.430413 | 6.463605 | 6.612704 | 6.700647 | 6.823844 | 6.895415 | 6.920829 |
| 6.116229 | 6.343326 | 6.42958  | 6.492758 | 6.652056 | 6.660637 | 6.806597 | 6.891872 | 6.916475 |
| 6.148848 | 6.296044 | 6.419025 | 6.457812 | 6.551157 | 6.667857 | 6.710839 | 6.894278 | 6.919581 |
| 6.18762  | 6.318561 | 6.403774 | 6.44524  | 6.597933 | 6.676801 | 6.713532 | 6.891531 | 6.91768  |

|          |          |          |          |          |          |          |          |          |
|----------|----------|----------|----------|----------|----------|----------|----------|----------|
| 6.25979  | 6.319191 | 6.451243 | 6.595138 | 6.626786 | 6.772333 | 6.865485 | 7.130798 | 7.172668 |
| 6.188254 | 6.352687 | 6.488091 | 6.560624 | 6.600851 | 6.766102 | 6.862325 | 7.027023 | 7.147484 |
| 6.264555 | 6.401497 | 6.463478 | 6.571199 | 6.790456 | 6.858661 | 6.89097  | 7.065932 | 7.166563 |
| 6.35463  | 6.424333 | 6.492253 | 6.566656 | 6.774574 | 6.859411 | 6.86927  | 7.074904 | 7.10154  |
| 6.316773 | 6.439762 | 6.510404 | 6.585127 | 6.647727 | 6.772023 | 6.78394  | 6.926042 | 7.155117 |
| 6.328605 | 6.436081 | 6.48708  | 6.580562 | 6.605954 | 6.76061  | 6.77005  | 6.920339 | 7.164277 |
| 6.375865 | 6.449324 | 6.546344 | 6.635354 | 6.776879 | 6.820905 | 6.872345 | 6.922031 | 7.083779 |
| 6.404581 | 6.468068 | 6.576572 | 6.660113 | 6.765909 | 6.795087 | 6.900633 | 6.948181 | 7.093111 |

|           |           |           |           |           |           |           |           |           |
|-----------|-----------|-----------|-----------|-----------|-----------|-----------|-----------|-----------|
| -0.001184 | -0.000931 | -0.00084  | -0.000769 | -0.000714 | -0.000699 | -0.000667 | -0.000644 | -0.000496 |
| -0.001188 | -0.00094  | -0.000821 | -0.000785 | -0.000717 | -0.000691 | -0.000668 | -0.00061  | -0.000539 |
| -0.001332 | -0.001136 | -0.001041 | -0.000959 | -0.000802 | -0.000793 | -0.000767 | -0.000681 | -0.000577 |
| -0.00138  | -0.001247 | -0.001097 | -0.000992 | -0.000913 | -0.000761 | -0.00073  | -0.000669 | -0.00058  |
| -0.001416 | -0.001315 | -0.00115  | -0.001044 | -0.000941 | -0.000784 | -0.000719 | -0.000697 | -0.000622 |
| -0.001418 | -0.001206 | -0.001111 | -0.001013 | -0.000883 | -0.000846 | -0.000698 | -0.000684 | -0.000608 |
| -0.001316 | -0.00126  | -0.001116 | -0.001014 | -0.000921 | -0.000767 | -0.000751 | -0.000692 | -0.00058  |
| -0.001215 | -0.001154 | -0.000989 | -0.000966 | -0.000866 | -0.000795 | -0.00075  | -0.000692 | -0.000584 |
| -0.001427 | -0.001328 | -0.001136 | -0.001063 | -0.00095  | -0.000809 | -0.00072  | -0.000689 | -0.000604 |
| -0.001215 | -0.001154 | -0.000989 | -0.000966 | -0.000866 | -0.000795 | -0.00075  | -0.000692 | -0.000584 |
| -0.001257 | -0.001084 | -0.000976 | -0.000899 | -0.000826 | -0.000734 | -0.000705 | -0.000606 | -0.000587 |
| -0.001256 | -0.001085 | -0.000922 | -0.000872 | -0.000764 | -0.000738 | -0.000653 | -0.000602 | -0.000581 |
| -0.001324 | -0.001117 | -0.001024 | -0.000898 | -0.000842 | -0.000729 | -0.000657 | -0.000602 | -0.000584 |

|           |           |           |           |           |           |           |           |           |
|-----------|-----------|-----------|-----------|-----------|-----------|-----------|-----------|-----------|
| -0.001312 | -0.001068 | -0.001041 | -0.000914 | -0.000791 | -0.000747 | -0.00066  | -0.000602 | -0.000593 |
| -0.001276 | -0.001103 | -0.000962 | -0.00093  | -0.000801 | -0.000734 | -0.000649 | -0.000604 | -0.000589 |
| -0.001317 | -0.001049 | -0.000962 | -0.000903 | -0.00077  | -0.000764 | -0.00066  | -0.000606 | -0.000591 |
| -0.001275 | -0.0011   | -0.000973 | -0.000936 | -0.000852 | -0.000758 | -0.000726 | -0.000604 | -0.000589 |
| -0.001226 | -0.001075 | -0.000988 | -0.000947 | -0.000813 | -0.000751 | -0.000724 | -0.000606 | -0.000591 |
| -0.001141 | -0.001075 | -0.000942 | -0.000815 | -0.00079  | -0.000683 | -0.000622 | -0.000477 | -0.000458 |
| -0.001225 | -0.001039 | -0.000908 | -0.000844 | -0.000811 | -0.000687 | -0.000624 | -0.000529 | -0.000469 |
| -0.001135 | -0.00099  | -0.00093  | -0.000835 | -0.000671 | -0.000626 | -0.000606 | -0.000509 | -0.00046  |
| -0.001037 | -0.000967 | -0.000904 | -0.000839 | -0.000681 | -0.000626 | -0.00062  | -0.000505 | -0.000491 |
| -0.001077 | -0.000953 | -0.000888 | -0.000824 | -0.000774 | -0.000683 | -0.000675 | -0.000586 | -0.000466 |
| -0.001065 | -0.000956 | -0.000909 | -0.000827 | -0.000807 | -0.000691 | -0.000684 | -0.000589 | -0.000461 |
| -0.001016 | -0.000944 | -0.000856 | -0.000783 | -0.00068  | -0.000651 | -0.000618 | -0.000588 | -0.0005   |
| -0.000987 | -0.000926 | -0.000831 | -0.000764 | -0.000687 | -0.000668 | -0.000601 | -0.000573 | -0.000495 |

|          |          |          |          |          |          |          |          |          |
|----------|----------|----------|----------|----------|----------|----------|----------|----------|
| 7.107652 | 7.150901 | 7.218573 | 7.229336 | 7.248549 | 7.433115 | 7.527849 | 7.739636 | 7.898811 |
| 7.079368 | 7.109423 | 7.208378 | 7.221501 | 7.24756  | 7.295782 | 7.429864 | 7.738688 | 7.897335 |
| 7.151386 | 7.230062 | 7.236167 | 7.262201 | 7.282206 | 7.311611 | 7.333679 | 7.414274 | 7.715845 |
| 6.988447 | 7.138394 | 7.221338 | 7.263088 | 7.269614 | 7.310986 | 7.332633 | 7.462393 | 7.813537 |
| 7.017786 | 7.10297  | 7.234864 | 7.256493 | 7.303438 | 7.315602 | 7.325266 | 7.507692 | 7.817923 |
| 7.132667 | 7.202415 | 7.22557  | 7.237698 | 7.264784 | 7.289258 | 7.321823 | 7.364313 | 7.745932 |

|          |          |          |          |          |          |          |          |          |
|----------|----------|----------|----------|----------|----------|----------|----------|----------|
| 7.008511 | 7.134372 | 7.232107 | 7.253228 | 7.287231 | 7.321312 | 7.340441 | 7.470118 | 7.814862 |
| 7.158572 | 7.204918 | 7.237576 | 7.254131 | 7.278777 | 7.317563 | 7.337222 | 7.357903 | 7.725032 |
| 6.996778 | 7.13368  | 7.207088 | 7.26185  | 7.285909 | 7.32207  | 7.333427 | 7.515871 | 7.812334 |
| 7.158572 | 7.204918 | 7.237576 | 7.254131 | 7.278777 | 7.317563 | 7.337222 | 7.357903 | 7.725032 |

|          |          |          |          |          |          |          |          |          |
|----------|----------|----------|----------|----------|----------|----------|----------|----------|
| 7.066068 | 7.140352 | 7.243431 | 7.26576  | 7.297286 | 7.330935 | 7.397148 | 7.433469 | 7.753678 |
| 6.972279 | 7.076256 | 7.156694 | 7.164441 | 7.266807 | 7.320548 | 7.356896 | 7.395503 | 7.787473 |
| 7.077563 | 7.13204  | 7.218494 | 7.254619 | 7.290345 | 7.370072 | 7.378177 | 7.40462  | 7.730672 |
| 7.066937 | 7.122087 | 7.157904 | 7.185057 | 7.270512 | 7.275985 | 7.382708 | 7.419979 | 7.76787  |

|          |          |          |          |          |          |          |          |          |
|----------|----------|----------|----------|----------|----------|----------|----------|----------|
| 7.013099 | 7.071088 | 7.151289 | 7.220756 | 7.276283 | 7.277781 | 7.361196 | 7.378372 | 7.768179 |
| 6.970426 | 7.068419 | 7.157494 | 7.184764 | 7.281974 | 7.306257 | 7.36324  | 7.392836 | 7.784331 |
| 7.064914 | 7.129929 | 7.227992 | 7.243992 | 7.284912 | 7.31153  | 7.374718 | 7.40417  | 7.722445 |
| 7.062672 | 7.113247 | 7.143984 | 7.19062  | 7.264485 | 7.330985 | 7.350118 | 7.384427 | 7.76616  |

|          |          |          |          |          |          |          |          |          |
|----------|----------|----------|----------|----------|----------|----------|----------|----------|
| 7.223011 | 7.26812  | 7.288928 | 7.345044 | 7.391744 | 7.414887 | 7.474938 | 7.56086  | 7.973428 |
| 7.200304 | 7.247197 | 7.272734 | 7.283684 | 7.332451 | 7.363479 | 7.381099 | 7.580412 | 7.983944 |
| 7.202411 | 7.220169 | 7.262021 | 7.308213 | 7.376722 | 7.445333 | 7.53699  | 7.564382 | 7.843872 |
| 7.184111 | 7.218927 | 7.262902 | 7.360804 | 7.383158 | 7.43172  | 7.534353 | 7.565376 | 7.867543 |
| 7.206124 | 7.247762 | 7.26531  | 7.28126  | 7.363316 | 7.382749 | 7.505798 | 7.57274  | 7.9839   |
| 7.224152 | 7.233414 | 7.268276 | 7.285043 | 7.343092 | 7.347135 | 7.443437 | 7.604569 | 7.987864 |
| 7.205391 | 7.217755 | 7.242483 | 7.272676 | 7.337035 | 7.39775  | 7.530624 | 7.715117 | 7.86937  |
| 7.189871 | 7.2165   | 7.23539  | 7.253392 | 7.294683 | 7.34581  | 7.580169 | 7.586961 | 7.837969 |

|           |           |           |           |           |           |           |           |           |
|-----------|-----------|-----------|-----------|-----------|-----------|-----------|-----------|-----------|
| -0.000488 | -0.000468 | -0.000437 | -0.000432 | -0.000424 | -0.000353 | -0.000321 | -0.000259 | -0.000221 |
| -0.000502 | -0.000487 | -0.000441 | -0.000436 | -0.000425 | -0.000405 | -0.000354 | -0.00026  | -0.000222 |
| -0.000467 | -0.000432 | -0.000429 | -0.000418 | -0.00041  | -0.000398 | -0.000389 | -0.000359 | -0.000266 |
| -0.00055  | -0.000474 | -0.000436 | -0.000418 | -0.000415 | -0.000398 | -0.00039  | -0.000342 | -0.000241 |
| -0.000534 | -0.000491 | -0.00043  | -0.000421 | -0.000401 | -0.000397 | -0.000393 | -0.000327 | -0.00024  |
| -0.000476 | -0.000444 | -0.000434 | -0.000429 | -0.000417 | -0.000407 | -0.000394 | -0.000378 | -0.000258 |
| -0.000539 | -0.000475 | -0.000431 | -0.000422 | -0.000408 | -0.000394 | -0.000387 | -0.00034  | -0.000241 |
| -0.000464 | -0.000443 | -0.000429 | -0.000422 | -0.000411 | -0.000396 | -0.000388 | -0.00038  | -0.000263 |
| -0.000546 | -0.000476 | -0.000442 | -0.000418 | -0.000409 | -0.000394 | -0.00039  | -0.000325 | -0.000241 |
| -0.000464 | -0.000443 | -0.000429 | -0.000422 | -0.000411 | -0.000396 | -0.000388 | -0.00038  | -0.000263 |
| -0.000509 | -0.000473 | -0.000426 | -0.000417 | -0.000404 | -0.000391 | -0.000366 | -0.000352 | -0.000256 |
| -0.000559 | -0.000504 | -0.000465 | -0.000461 | -0.000416 | -0.000395 | -0.000381 | -0.000366 | -0.000247 |
| -0.000503 | -0.000477 | -0.000437 | -0.000422 | -0.000407 | -0.000376 | -0.000373 | -0.000363 | -0.000262 |

-0.000509 -0.000481 -0.000464 -0.000452 -0.000415 -0.000413 -0.000371 -0.000357 -0.000252  
-0.000537 -0.000506 -0.000467 -0.000436 -0.000412 -0.000412 -0.000379 -0.000372 -0.000252  
-0.00056 -0.000508 -0.000465 -0.000452 -0.00041 -0.0004 -0.000378 -0.000367 -0.000248  
-0.00051 -0.000478 -0.000433 -0.000426 -0.000409 -0.000398 -0.000374 -0.000363 -0.000264  
-0.000511 -0.000486 -0.000471 -0.000449 -0.000417 -0.000391 -0.000383 -0.00037 -0.000253  
  
-0.000435 -0.000416 -0.000407 -0.000385 -0.000368 -0.000359 -0.000338 -0.00031 -0.000205  
-0.000445 -0.000425 -0.000414 -0.000409 -0.00039 -0.000378 -0.000371 -0.000304 -0.000203  
-0.000444 -0.000436 -0.000418 -0.0004 -0.000373 -0.000348 -0.000318 -0.000309 -0.000234  
-0.000452 -0.000437 -0.000418 -0.000379 -0.000371 -0.000353 -0.000319 -0.000309 -0.000228  
-0.000442 -0.000424 -0.000417 -0.00041 -0.000378 -0.000371 -0.000328 -0.000307 -0.000203  
-0.000435 -0.000431 -0.000416 -0.000409 -0.000386 -0.000384 -0.000349 -0.000297 -0.000202  
-0.000443 -0.000437 -0.000427 -0.000414 -0.000388 -0.000365 -0.00032 -0.000266 -0.000228  
-0.00045 -0.000438 -0.00043 -0.000422 -0.000405 -0.000385 -0.000304 -0.000302 -0.000235



|          |          |          |          |          |          |          |          |          |
|----------|----------|----------|----------|----------|----------|----------|----------|----------|
| 8.133036 | 8.510873 | 14.75652 | 14.83046 | 14.90406 | 15.03374 | 15.08303 | 15.24079 | 15.33119 |
| 8.131765 | 8.580689 | 14.74634 | 14.81908 | 14.88967 | 15.05809 | 15.07567 | 15.20342 | 15.31181 |
| 7.998334 | 8.147075 | 14.76411 | 14.81143 | 14.87897 | 14.9233  | 15.1269  | 15.1945  | 15.21276 |
| 8.007635 | 8.165147 | 14.11987 | 14.55028 | 14.79572 | 14.95349 | 15.07225 | 15.1342  | 15.24182 |
| 8.009135 | 8.170006 | 14.64832 | 14.74634 | 14.77987 | 14.96771 | 15.04685 | 15.15552 | 15.20321 |
| 7.997542 | 8.151109 | 14.83074 | 14.83745 | 14.84886 | 14.87204 | 15.16701 | 15.23215 | 15.24889 |

|          |          |          |          |          |          |          |          |          |
|----------|----------|----------|----------|----------|----------|----------|----------|----------|
| 8.013956 | 8.170009 | 14.24651 | 14.58273 | 14.77563 | 14.96023 | 15.08251 | 15.15255 | 15.18191 |
| 8.000397 | 8.147475 | 14.76389 | 14.83928 | 14.85065 | 14.87171 | 15.1434  | 15.16844 | 15.22067 |
| 7.99843  | 8.165369 | 14.64039 | 14.73644 | 14.88315 | 14.95911 | 15.01931 | 15.10005 | 15.16179 |
| 8.000397 | 8.147475 | 14.76389 | 14.83928 | 14.85065 | 14.87171 | 15.1434  | 15.16844 | 15.22067 |

|          |          |          |          |          |          |          |          |          |
|----------|----------|----------|----------|----------|----------|----------|----------|----------|
| 7.804193 | 8.186994 | 14.78108 | 14.79354 | 14.85343 | 14.88011 | 14.92627 | 15.15146 | 15.20195 |
| 7.8015   | 8.215305 | 14.32632 | 14.36971 | 14.53039 | 14.68713 | 14.79993 | 14.95897 | 15.16517 |
| 7.807616 | 8.181531 | 14.80448 | 14.85629 | 14.95397 | 14.96669 | 15.00212 | 15.14328 | 15.23716 |
| 7.804029 | 8.205944 | 14.57454 | 14.79525 | 14.80155 | 14.87834 | 14.917   | 15.14846 | 15.16007 |

|          |          |          |          |          |          |          |          |          |
|----------|----------|----------|----------|----------|----------|----------|----------|----------|
| 7.797632 | 8.194439 | 14.66552 | 14.72663 | 14.75141 | 14.84942 | 14.9271  | 14.93539 | 15.1168  |
| 7.800918 | 8.210623 | 14.3259  | 14.54554 | 14.68446 | 14.71705 | 14.78711 | 14.95993 | 15.07865 |
| 7.807754 | 8.178095 | 14.77616 | 14.8193  | 14.84064 | 14.88875 | 14.99909 | 15.16418 | 15.16704 |
| 7.803406 | 8.204853 | 14.32354 | 14.45531 | 14.78057 | 14.83449 | 14.91367 | 15.15543 | 15.15753 |

|          |          |          |          |          |          |          |          |          |
|----------|----------|----------|----------|----------|----------|----------|----------|----------|
| 8.127048 | 14.7836  | 14.91232 | 15.02961 | 15.12455 | 15.17148 | 15.30242 | 15.33023 | 15.41145 |
| 8.13283  | 14.81182 | 14.87122 | 14.99385 | 15.14963 | 15.18172 | 15.2177  | 15.29756 | 15.3796  |
| 8.133858 | 14.7982  | 14.95489 | 15.04626 | 15.18062 | 15.20644 | 15.31563 | 15.34713 | 15.40467 |
| 8.131982 | 14.79663 | 14.87902 | 15.05246 | 15.16187 | 15.19993 | 15.32915 | 15.34534 | 15.42227 |
| 8.128883 | 14.8045  | 14.90813 | 14.95613 | 15.13134 | 15.14637 | 15.17773 | 15.27237 | 15.28346 |
| 8.130283 | 14.78357 | 14.86443 | 14.90524 | 15.08807 | 15.14753 | 15.15478 | 15.23775 | 15.28303 |
| 8.132322 | 14.77548 | 14.91144 | 14.96974 | 15.12372 | 15.1889  | 15.27309 | 15.31007 | 15.33629 |
| 8.138574 | 14.78877 | 14.83018 | 14.95981 | 15.11475 | 15.12364 | 15.24649 | 15.29824 | 15.33645 |

|           |           |           |           |           |           |           |           |           |
|-----------|-----------|-----------|-----------|-----------|-----------|-----------|-----------|-----------|
| -0.000175 | -0.00012  | -2.33E-07 | -2.16E-07 | -2.01E-07 | -1.76E-07 | -1.68E-07 | -1.43E-07 | -1.31E-07 |
| -0.000175 | -0.000112 | -2.35E-07 | -2.19E-07 | -2.04E-07 | -1.72E-07 | -1.69E-07 | -1.49E-07 | -1.34E-07 |
| -0.0002   | -0.000173 | -2.31E-07 | -2.2E-07  | -2.06E-07 | -1.97E-07 | -1.61E-07 | -1.5E-07  | -1.47E-07 |
| -0.000198 | -0.00017  | -4.4E-07  | -2.86E-07 | -2.24E-07 | -1.91E-07 | -1.7E-07  | -1.59E-07 | -1.43E-07 |
| -0.000198 | -0.000169 | -2.59E-07 | -2.35E-07 | -2.27E-07 | -1.88E-07 | -1.74E-07 | -1.56E-07 | -1.49E-07 |
| -0.0002   | -0.000172 | -2.16E-07 | -2.15E-07 | -2.12E-07 | -2.07E-07 | -1.54E-07 | -1.45E-07 | -1.42E-07 |
| -0.000197 | -0.000169 | -3.87E-07 | -2.77E-07 | -2.28E-07 | -1.9E-07  | -1.68E-07 | -1.57E-07 | -1.52E-07 |
| -0.0002   | -0.000173 | -2.31E-07 | -2.14E-07 | -2.12E-07 | -2.07E-07 | -1.58E-07 | -1.54E-07 | -1.46E-07 |
| -0.0002   | -0.00017  | -2.61E-07 | -2.37E-07 | -2.05E-07 | -1.9E-07  | -1.79E-07 | -1.65E-07 | -1.55E-07 |
| -0.0002   | -0.000173 | -2.31E-07 | -2.14E-07 | -2.12E-07 | -2.07E-07 | -1.58E-07 | -1.54E-07 | -1.46E-07 |
| -0.000243 | -0.000166 | -2.27E-07 | -2.24E-07 | -2.11E-07 | -2.06E-07 | -1.96E-07 | -1.57E-07 | -1.49E-07 |
| -0.000244 | -0.000161 | -3.58E-07 | -3.42E-07 | -2.92E-07 | -2.49E-07 | -2.23E-07 | -1.9E-07  | -1.55E-07 |
| -0.000242 | -0.000167 | -2.22E-07 | -2.11E-07 | -1.91E-07 | -1.89E-07 | -1.82E-07 | -1.58E-07 | -1.44E-07 |

|           |           |           |           |           |           |           |           |           |
|-----------|-----------|-----------|-----------|-----------|-----------|-----------|-----------|-----------|
| -0.000243 | -0.000163 | -2.79E-07 | -2.24E-07 | -2.22E-07 | -2.06E-07 | -1.98E-07 | -1.57E-07 | -1.55E-07 |
| -0.000245 | -0.000165 | -2.55E-07 | -2.4E-07  | -2.34E-07 | -2.12E-07 | -1.96E-07 | -1.95E-07 | -1.62E-07 |
| -0.000244 | -0.000162 | -3.58E-07 | -2.87E-07 | -2.5E-07  | -2.42E-07 | -2.26E-07 | -1.9E-07  | -1.69E-07 |
| -0.000242 | -0.000167 | -2.28E-07 | -2.18E-07 | -2.14E-07 | -2.04E-07 | -1.83E-07 | -1.55E-07 | -1.54E-07 |
| -0.000243 | -0.000163 | -3.59E-07 | -3.14E-07 | -2.27E-07 | -2.15E-07 | -1.99E-07 | -1.56E-07 | -1.56E-07 |
| -0.000176 | -2.26E-07 | -1.99E-07 | -1.77E-07 | -1.61E-07 | -1.54E-07 | -1.35E-07 | -1.31E-07 | -1.21E-07 |
| -0.000175 | -2.2E-07  | -2.07E-07 | -1.83E-07 | -1.57E-07 | -1.52E-07 | -1.47E-07 | -1.35E-07 | -1.25E-07 |
| -0.000175 | -2.23E-07 | -1.91E-07 | -1.74E-07 | -1.52E-07 | -1.48E-07 | -1.33E-07 | -1.29E-07 | -1.22E-07 |
| -0.000175 | -2.23E-07 | -2.06E-07 | -1.73E-07 | -1.55E-07 | -1.49E-07 | -1.31E-07 | -1.29E-07 | -1.2E-07  |
| -0.000176 | -2.22E-07 | -2E-07    | -1.91E-07 | -1.6E-07  | -1.58E-07 | -1.53E-07 | -1.39E-07 | -1.37E-07 |
| -0.000176 | -2.26E-07 | -2.09E-07 | -2E-07    | -1.67E-07 | -1.57E-07 | -1.56E-07 | -1.44E-07 | -1.37E-07 |
| -0.000175 | -2.28E-07 | -1.99E-07 | -1.88E-07 | -1.61E-07 | -1.51E-07 | -1.39E-07 | -1.34E-07 | -1.3E-07  |
| -0.000174 | -2.25E-07 | -2.16E-07 | -1.9E-07  | -1.63E-07 | -1.61E-07 | -1.43E-07 | -1.35E-07 | -1.3E-07  |

|          |          |          |          |          |          |          |          |
|----------|----------|----------|----------|----------|----------|----------|----------|
| 15.40314 | 15.4723  | 15.48009 | 15.5177  | 15.58248 | 15.78126 | 16.1694  | 17.72503 |
| 15.33085 | 15.42323 | 15.47906 | 15.51266 | 15.58126 | 15.78253 | 16.30295 | 17.72688 |
| 15.21847 | 15.50756 | 15.53497 | 15.57469 | 15.62708 | 15.71606 | 17.19685 | 17.35686 |
| 15.25977 | 15.52489 | 15.55264 | 15.6132  | 15.63893 | 15.71365 | 17.17213 | 17.2861  |
| 15.21507 | 15.52566 | 15.54753 | 15.59183 | 15.63183 | 15.78027 | 17.22058 | 17.29406 |
| 15.27638 | 15.51665 | 15.5383  | 15.57992 | 15.62811 | 15.71091 | 17.18569 | 17.34701 |

|          |          |          |          |          |          |          |          |
|----------|----------|----------|----------|----------|----------|----------|----------|
| 15.217   | 15.50712 | 15.53816 | 15.57731 | 15.62965 | 15.78035 | 17.19944 | 17.28929 |
| 15.24982 | 15.49541 | 15.53264 | 15.57226 | 15.62664 | 15.72879 | 17.10036 | 17.35196 |
| 15.23905 | 15.52507 | 15.55323 | 15.61571 | 15.64412 | 15.74604 | 17.2101  | 17.28584 |
| 15.24982 | 15.49541 | 15.53264 | 15.57226 | 15.62664 | 15.72879 | 17.10036 | 17.35196 |

|          |          |          |          |          |          |          |          |
|----------|----------|----------|----------|----------|----------|----------|----------|
| 15.26304 | 15.27927 | 15.52185 | 15.56088 | 15.59702 | 15.63944 | 17.1571  | 17.62707 |
| 15.16603 | 15.23532 | 15.52467 | 15.56865 | 15.60192 | 15.6458  | 17.19622 | 17.64455 |
| 15.25897 | 15.2753  | 15.51941 | 15.55702 | 15.59343 | 15.63663 | 17.30316 | 17.63821 |
| 15.18276 | 15.19109 | 15.52142 | 15.56669 | 15.5998  | 15.64317 | 17.35099 | 17.61539 |

|          |          |          |          |          |          |          |          |
|----------|----------|----------|----------|----------|----------|----------|----------|
| 15.19324 | 15.27475 | 15.52507 | 15.56428 | 15.60165 | 15.64128 | 17.16191 | 17.61869 |
| 15.15758 | 15.15997 | 15.52512 | 15.57016 | 15.60443 | 15.64559 | 17.21315 | 17.6271  |
| 15.23774 | 15.24974 | 15.52174 | 15.56069 | 15.59599 | 15.63816 | 17.23408 | 17.66622 |
| 15.18053 | 15.19922 | 15.52369 | 15.57187 | 15.6031  | 15.64544 | 17.31303 | 17.64297 |

|          |          |          |          |          |          |          |  |
|----------|----------|----------|----------|----------|----------|----------|--|
| 15.41525 | 15.51569 | 15.55388 | 15.61286 | 15.78359 | 17.27463 | 17.53879 |  |
| 15.4779  | 15.52226 | 15.56313 | 15.61652 | 15.73285 | 17.23406 | 17.49416 |  |
| 15.49634 | 15.5199  | 15.57165 | 15.61431 | 15.67141 | 17.29061 | 17.67432 |  |
| 15.494   | 15.51516 | 15.56586 | 15.61176 | 15.66322 | 17.33199 | 17.68925 |  |
| 15.45582 | 15.52096 | 15.55917 | 15.61573 | 15.74148 | 17.20562 | 17.48317 |  |
| 15.47859 | 15.52231 | 15.56378 | 15.61861 | 15.74146 | 17.18572 | 17.46066 |  |
| 15.49395 | 15.51609 | 15.56662 | 15.61146 | 15.67576 | 17.29026 | 17.69702 |  |
| 15.50378 | 15.52434 | 15.56919 | 15.57418 | 15.61766 | 17.14053 | 17.69751 |  |

|           |           |           |           |           |           |           |           |
|-----------|-----------|-----------|-----------|-----------|-----------|-----------|-----------|
| -1.22E-07 | -1.14E-07 | -1.13E-07 | -1.09E-07 | -1.02E-07 | -8.35E-08 | -5.66E-08 | -1.2E-08  |
| -1.31E-07 | -1.19E-07 | -1.13E-07 | -1.09E-07 | -1.02E-07 | -8.34E-08 | -4.95E-08 | -1.19E-08 |
| -1.47E-07 | -1.1E-07  | -1.07E-07 | -1.03E-07 | -9.74E-08 | -8.91E-08 | -2.03E-08 | -1.73E-08 |
| -1.41E-07 | -1.08E-07 | -1.05E-07 | -9.88E-08 | -9.63E-08 | -8.93E-08 | -2.08E-08 | -1.85E-08 |
| -1.47E-07 | -1.08E-07 | -1.05E-07 | -1.01E-07 | -9.69E-08 | -8.36E-08 | -1.98E-08 | -1.84E-08 |
| -1.38E-07 | -1.09E-07 | -1.06E-07 | -1.02E-07 | -9.73E-08 | -8.96E-08 | -2.05E-08 | -1.74E-08 |
| -1.47E-07 | -1.1E-07  | -1.06E-07 | -1.02E-07 | -9.72E-08 | -8.36E-08 | -2.02E-08 | -1.85E-08 |
| -1.42E-07 | -1.11E-07 | -1.07E-07 | -1.03E-07 | -9.74E-08 | -8.8E-08  | -2.23E-08 | -1.74E-08 |
| -1.44E-07 | -1.08E-07 | -1.05E-07 | -9.85E-08 | -9.58E-08 | -8.65E-08 | -2E-08    | -1.85E-08 |
| -1.42E-07 | -1.11E-07 | -1.07E-07 | -1.03E-07 | -9.74E-08 | -8.8E-08  | -2.23E-08 | -1.74E-08 |
| -1.4E-07  | -1.38E-07 | -1.08E-07 | -1.04E-07 | -1E-07    | -9.62E-08 | -2.11E-08 | -1.32E-08 |
| -1.54E-07 | -1.44E-07 | -1.08E-07 | -1.03E-07 | -9.99E-08 | -9.56E-08 | -2.03E-08 | -1.3E-08  |
| -1.41E-07 | -1.38E-07 | -1.08E-07 | -1.04E-07 | -1.01E-07 | -9.65E-08 | -1.82E-08 | -1.3E-08  |

-1.52E-07 -1.51E-07 -1.08E-07 -1.03E-07 -1E-07 -9.58E-08 -1.74E-08 -1.33E-08  
-1.5E-07 -1.39E-07 -1.08E-07 -1.04E-07 -9.99E-08 -9.6E-08 -2.1E-08 -1.33E-08  
-1.56E-07 -1.55E-07 -1.08E-07 -1.03E-07 -9.96E-08 -9.56E-08 -1.99E-08 -1.32E-08  
-1.44E-07 -1.42E-07 -1.08E-07 -1.04E-07 -1E-07 -9.63E-08 -1.95E-08 -1.27E-08  
-1.52E-07 -1.49E-07 -1.08E-07 -1.03E-07 -9.98E-08 -9.56E-08 -1.8E-08 -1.3E-08

-1.2E-07 -1.09E-07 -1.05E-07 -9.88E-08 -8.33E-08 -1.88E-08 -1.44E-08  
-1.13E-07 -1.08E-07 -1.04E-07 -9.84E-08 -8.76E-08 -1.95E-08 -1.51E-08  
-1.11E-07 -1.08E-07 -1.03E-07 -9.87E-08 -9.32E-08 -1.85E-08 -1.26E-08  
-1.11E-07 -1.09E-07 -1.04E-07 -9.89E-08 -9.39E-08 -1.77E-08 -1.24E-08  
-1.16E-07 -1.08E-07 -1.04E-07 -9.85E-08 -8.69E-08 -2.01E-08 -1.52E-08  
-1.13E-07 -1.08E-07 -1.04E-07 -9.82E-08 -8.69E-08 -2.05E-08 -1.56E-08  
-1.11E-07 -1.09E-07 -1.03E-07 -9.89E-08 -9.28E-08 -1.85E-08 -1.23E-08  
-1.1E-07 -1.08E-07 -1.03E-07 -1.03E-07 -9.83E-08 -2.14E-08 -1.23E-08

| V(gas)    | V(solv)   | Vzp       | dVzp     | Fvib   |
|-----------|-----------|-----------|----------|--------|
| -361114   | -361157.7 | -360998.8 | 158.8827 | -4.537 |
| -361115.4 | -361158.7 | -360999.9 | 158.7964 | -5.392 |
| -361106.1 | -361155.1 | -360995.2 | 159.8238 | 0.350  |
| -361105.5 | -361153.9 | -360994   | 159.9548 | 1.702  |
| -361105.3 | -361153.4 | -360993.2 | 160.1397 | 2.783  |
| -361103.3 | -361153.9 | -360993.9 | 159.9965 | 1.907  |
| -361107   | -361154.6 | -360994.7 | 159.9157 | 0.989  |
| -361106.1 | -361155   | -360995.2 | 159.8199 | 0.509  |
| -361103.9 | -361152.4 | -360992.4 | 160.0211 | 3.482  |
| -361106.1 | -361155   | -360995   | 160.0211 | 3.482  |
| -361105.6 | -361150.7 | -360990.9 | 159.8472 | 5.006  |
| -361105.5 | -361150.5 | -360990.8 | 159.6334 | 4.778  |
| -361112.5 | -361158.5 | -360998.4 | 160.0893 | -2.195 |
| -361110.4 | -361155.1 | -360995.3 | 159.8806 | 0.881  |
| -361105.9 | -361151.7 | -360992.1 | 159.5887 | 3.792  |
| -361105.9 | -361150.2 | -360990.7 | 159.4828 | 4.942  |
| -361115.4 | -361159.6 | -360999.8 | 159.8753 | -3.586 |
| -361113.2 | -361156.4 | -360996.7 | 159.712  | -0.558 |
| -361101.6 | -361148.1 | -360988.9 | 159.2393 | 7.036  |
| -361101.9 | -361150.3 | -360990.9 | 159.3643 | 5.187  |
| -361100.2 | -361145.4 | -360986.2 | 159.215  | 9.869  |
| -361107.9 | -361155.3 | -360996.2 | 159.1915 | 0.033  |
| -361105   | -361151.6 | -360992.5 | 159.1144 | 2.735  |
| -361105.4 | -361152.3 | -360993.1 | 159.2074 | 2.940  |
| -361111   | -361156.4 | -360997.3 | 159.0919 | -1.093 |
| -361102.4 | -361147.7 | -360988.6 | 159.0757 | 7.227  |
| -361085.1 |           |           |          |        |
| -361115.4 | -361159.6 | -360999.9 |          | -5.392 |

|                |                |           |                  |             |         |          |          |          |
|----------------|----------------|-----------|------------------|-------------|---------|----------|----------|----------|
| original label | should be      |           |                  |             |         |          |          |          |
| cis            | cis            | -575.4713 | -575.541         |             | 33.8376 | 61.1242  | 71.8869  | 100.7915 |
| trans          | trans          | -575.4736 | -575.5426        |             | 39.6662 | 54.9029  | 95.1427  | 115.1009 |
| 5ovLax         | 5ovLax         | -575.4587 | <b>-575.5367</b> |             | 52.7851 | 73.8789  | 104.1325 | 172.8832 |
| 5ovLeq         | 5ovLeq         | -575.4577 | -575.535         |             | 51.7802 | 71.4273  | 110.5728 | 192.3559 |
| 5offReq        | 5ovReq         | -575.4574 | -575.5341        |             | 70.3252 | 92.6965  | 119.3439 | 180.8979 |
| 5offRax        | 5ovRax         | -575.4542 | -575.5348        |             | 44.4258 | 72.2507  | 117.1797 | 192.3518 |
| 5ovReq         | 5offReq        | -575.4602 | -575.536         |             | 59.7885 | 69.4494  | 103.8231 | 184.4625 |
| 5offLax        | 5offRax        | -575.4587 | <b>-575.5366</b> |             | 48.2924 | 71.0594  | 105.6866 | 198.9512 |
| 5offLeq        | 5offLeq        | -575.4553 | -575.5326        |             | 67.4758 | 82.084   | 109.214  | 176.4485 |
|                | <b>5offLax</b> | -575.4587 | -575.5366        | n06 optimiz | 48.2924 | 71.0594  | 105.6866 | 198.9512 |
| 6ovBax         | 6ovBax         | -575.4579 | -575.5299        |             | 61.4032 | 67.0944  | 136.5143 | 201.4596 |
| 6ovBeq         | 6ovBeq         | -575.4578 | -575.5294        |             | 39.085  | 60.9192  | 131.2948 | 199.7919 |
| 6ovCax         | 6ovCax         | -575.4689 | <b>-575.5422</b> |             | 67.5548 | 98.179   | 150.6853 | 199.8572 |
| 6ovCeq         | 6ovCeq         | -575.4656 | -575.5369        |             | 63.6127 | 100.0908 | 154.2006 | 191.6813 |
| 6offBax        | 6offBax        | -575.4585 | -575.5313        |             | 59.3309 | 67.8311  | 131.4808 | 200.6829 |
| 6offBeq        | 6offBeq        | -575.4584 | -575.529         |             | 47.0914 | 62.9766  | 126.6164 | 198.09   |
| 6offCax        | 6offCax        | -575.4735 | <b>-575.544</b>  |             | 67.6754 | 96.0721  | 143.7067 | 208.9962 |
| 6offCeq        | 6offCeq        | -575.47   | -575.5388        |             | 62.7754 | 98.2099  | 146.863  | 199.1552 |
| cis=5offL      | cis=5offL      | -575.4516 | -575.5256        | -253.1545   | 58.9333 | 87.2517  | 105.4609 | 200.0283 |
| cis=5ovR       | cis=5ovR       | -575.4519 | -575.5291        | -260.9435   | 60.881  | 92.9946  | 114.5779 | 221.0033 |
| cis=6offB      | cis=6offB      | -575.4493 | -575.5214        | -241.6701   | 70.5938 | 74.0575  | 147.434  | 200.7978 |
| cis=6ovC       | cis=6ovC       | -575.4615 | -575.5372        | -223.0392   | 75.3634 | 91.9935  | 148.3562 | 163.0139 |
| tr=5offL       | tr=5ovL        | -575.4569 | -575.5312        | -250.19     | 19.4575 | 87.3784  | 108.7671 | 184.9427 |
| tr=5ovR        | tr=5offR       | -575.4577 | -575.5324        | -216.8143   | 61.3571 | 91.6452  | 109.9428 | 208.34   |
| tr=6offC       | tr=6offC       | -575.4665 | -575.5389        | -224.6579   | 70.5903 | 94.4453  | 151.001  | 207.3269 |
| tr=6ovB        | tr=6ovB        | -575.4528 | -575.525         | -261.6293   | 49.9448 | 69.4503  | 143.7401 | 194.2988 |
|                | wrong5-6       | -575.4252 |                  |             |         |          |          |          |

|          |          |          |          |          |          |          |          |          |
|----------|----------|----------|----------|----------|----------|----------|----------|----------|
| 129.2777 | 179.0036 | 211.1257 | 225.3694 | 258.7432 | 315.1182 | 399.9999 | 435.7334 | 468.9439 |
| 145.634  | 198.2832 | 217.1103 | 225.035  | 236.588  | 301.5315 | 357.3835 | 437.2314 | 468.157  |
| 198.8929 | 224.9234 | 228.302  | 276.9603 | 326.0858 | 383.7428 | 430.266  | 438.5003 | 476.4923 |
| 201.8186 | 230.8806 | 243.0653 | 283.9385 | 314.7625 | 396.4083 | 432.2059 | 439.623  | 499.0017 |
| 215.4491 | 253.534  | 259.9602 | 273.2174 | 312.0805 | 345.5292 | 428.2238 | 456.9196 | 484.4557 |
| 237.7261 | 260.1503 | 283.2718 | 287.6192 | 350.8378 | 368.5177 | 433.8449 | 457.043  | 481.0764 |
| 206.5625 | 221.5169 | 243.9391 | 272.7094 | 292.3291 | 371.6003 | 424.5675 | 454.3239 | 489.6967 |
| 224.1079 | 252.0714 | 265.7215 | 272.7451 | 309.1719 | 377.019  | 426.13   | 448.6242 | 472.1621 |
| 208.7597 | 245.053  | 261.438  | 291.9145 | 317.9912 | 369.199  | 429.7791 | 443.3963 | 484.8917 |
| 224.1079 | 252.0714 | 265.7215 | 272.7451 | 309.1719 | 377.019  | 426.13   | 448.6242 | 472.1621 |
| 221.9678 | 243.533  | 273.608  | 289.4782 | 327.6379 | 409.9958 | 422.0126 | 465.0812 | 487.0028 |
| 217.2015 | 259.3486 | 280.2278 | 302.7848 | 357.2093 | 392.7016 | 408.8816 | 459.0315 | 493.0734 |
| 215.8152 | 238.2151 | 293.425  | 311.0834 | 353.1196 | 419.7563 | 448.0715 | 470.7726 | 486.6671 |
| 206.368  | 231.361  | 286.8017 | 301.9861 | 361.6899 | 414.553  | 424.3989 | 462.7447 | 483.0479 |
| 228.249  | 244.9482 | 264.9842 | 304.6659 | 338.7073 | 384.181  | 435.5326 | 467.5699 | 478.1765 |
| 224.3311 | 247.9632 | 267.41   | 303.6517 | 339.9904 | 364.8924 | 425.3239 | 455.0985 | 463.307  |
| 225.8437 | 238.2416 | 277.9115 | 295.7141 | 376.9135 | 396.4854 | 432.2854 | 438.8723 | 463.4034 |
| 229.0637 | 236.2234 | 273.4197 | 292.3647 | 383.7369 | 396.376  | 428.3686 | 437.9772 | 453.0834 |
| 218.423  | 242.1299 | 245.66   | 269.778  | 298.8833 | 419.4397 | 438.7402 | 464.737  | 487.2543 |
| 229.5418 | 261.6855 | 273.7542 | 295.9146 | 309.7297 | 402.6828 | 437.6768 | 466.2148 | 499.558  |
| 225.3338 | 247.2558 | 253.9173 | 278.881  | 335.5695 | 428.967  | 445.9116 | 474.5539 | 484.4464 |
| 222.7437 | 235.4977 | 291.2814 | 310.7238 | 341.9011 | 420.4287 | 438.0731 | 468.532  | 474.8307 |
| 200.7957 | 232.474  | 240.6742 | 267.2731 | 333.8094 | 401.4692 | 437.6336 | 450.821  | 486.332  |
| 235.9855 | 254.0446 | 258.6765 | 290.8164 | 334.8031 | 388.8368 | 433.0963 | 455.1604 | 485.6267 |
| 210.5653 | 243.269  | 268.7861 | 299.9173 | 362.3723 | 401.8942 | 440.5478 | 453.1255 | 476.0138 |
| 216.8116 | 233.2057 | 271.4591 | 306.9219 | 350.3486 | 410.4836 | 439.6076 | 473.861  | 483.5592 |

|          |          |          |          |          |          |          |          |          |
|----------|----------|----------|----------|----------|----------|----------|----------|----------|
| 469.442  | 508.124  | 554.363  | 578.1104 | 594.1399 | 614.5746 | 655.0872 | 716.3017 | 757.7317 |
| 481.5443 | 499.2936 | 513.6481 | 556.8961 | 577.8294 | 596.4896 | 654.2461 | 715.3715 | 767.0986 |
| 522.3514 | 563.3543 | 576.7692 | 610.9688 | 640.5886 | 691.4593 | 707.4203 | 746.8983 | 764.4566 |
| 534.6312 | 570.3165 | 589.1902 | 601.9863 | 642.2717 | 708.5266 | 747.6345 | 765.3647 | 772.3042 |
| 544.0443 | 576.3732 | 587.2285 | 633.8193 | 656.1495 | 721.9718 | 755.1595 | 773.6808 | 778.0471 |
| 523.1138 | 562.6323 | 581.3154 | 609.0857 | 651.1047 | 657.0002 | 737.7226 | 763.7661 | 768.3335 |
| 555.634  | 563.6855 | 583.1427 | 622.1372 | 654.4614 | 711.0707 | 753.2139 | 758.8796 | 774.6546 |
| 521.35   | 564.757  | 583.7843 | 612.3262 | 633.2394 | 642.4125 | 720.8508 | 745.8009 | 766.9505 |
| 550.2921 | 568.8677 | 590.818  | 615.1534 | 642.6891 | 729.8982 | 750.1367 | 772.3528 | 773.2738 |
| 521.35   | 564.757  | 583.7843 | 612.3262 | 633.2394 | 642.4125 | 720.8508 | 745.8009 | 766.9505 |
| 501.3654 | 528.6358 | 546.761  | 576.4623 | 609.6885 | 661.587  | 715.9506 | 741.7997 | 766.4702 |
| 500.9128 | 521.7842 | 524.8043 | 545.6223 | 594.4817 | 650.0228 | 703.5005 | 743.8488 | 766.2461 |
| 495.4734 | 508.0678 | 540.9144 | 575.234  | 581.8512 | 654.29   | 696.4939 | 712.8443 | 769.2649 |
| 502.4935 | 509.3429 | 527.0057 | 542.9133 | 585.4287 | 596.7749 | 697.3122 | 740.9736 | 769.3772 |
| 492.1022 | 514.4709 | 538.5757 | 564.5312 | 580.0242 | 646.8812 | 703.9508 | 755.6336 | 769.6629 |
| 491.1613 | 521.6305 | 528.514  | 571.9854 | 573.5057 | 631.1842 | 698.3306 | 733.2179 | 767.7192 |
| 503.8598 | 521.1862 | 541.1705 | 550.6481 | 578.4878 | 651.6926 | 675.9732 | 712.4468 | 768.0593 |
| 482.122  | 516.6697 | 533.407  | 543.6411 | 561.0731 | 593.4923 | 686.9461 | 729.0457 | 771.652  |
| 559.0844 | 567.5051 | 586.9025 | 632.8264 | 661.3501 | 679.6454 | 745.6144 | 769.1894 | 769.5601 |
| 553.1144 | 570.7744 | 585.97   | 614.2895 | 644.0465 | 684.9333 | 749.8316 | 771.7837 | 777.4506 |
| 503.5512 | 553.1768 | 565.6218 | 581.8195 | 633.8948 | 704.6573 | 738.7427 | 751.7918 | 773.3451 |
| 498.006  | 552.3954 | 568.1835 | 580.784  | 602.4108 | 684.9772 | 701.9596 | 730.4793 | 772.2497 |
| 547.1195 | 565.9192 | 587.5477 | 612.9207 | 671.1393 | 690.8821 | 731.9231 | 765.1491 | 772.1287 |
| 559.2892 | 567.0076 | 585.278  | 611.4365 | 622.6916 | 699.9899 | 716.0421 | 761.1318 | 774.2791 |
| 494.2806 | 549.9944 | 560.5833 | 566.7393 | 587.4042 | 657.1467 | 695.5798 | 722.298  | 771.732  |
| 490.6568 | 537.7104 | 562.0813 | 568.0355 | 598.5818 | 680.2466 | 723.4284 | 766.9594 | 771.5663 |



|          |          |          |          |          |          |          |          |          |
|----------|----------|----------|----------|----------|----------|----------|----------|----------|
| 767.9273 | 775.8787 | 778.825  | 828.1398 | 843.4429 | 872.5821 | 893.8537 | 953.7609 | 958.0904 |
| 774.5841 | 776.4584 | 800.9326 | 832.3484 | 845.9482 | 873.5184 | 894.1907 | 956.2312 | 959.5062 |
| 779.3149 | 785.1562 | 806.3082 | 841.6901 | 881.5689 | 897.8074 | 930.8463 | 946.7129 | 961.8087 |
| 789.0967 | 804.3625 | 838.6553 | 876.1302 | 899.7938 | 936.9325 | 953.2768 | 978.1887 | 984.6459 |
| 787.5224 | 806.8612 | 839.0615 | 875.6591 | 894.4771 | 923.3333 | 959.1194 | 981.6307 | 996.5797 |
| 779.2593 | 784.4417 | 827.0873 | 876.8513 | 893.3103 | 897.7514 | 928.0291 | 959.9808 | 964.4396 |
| 784.6771 | 808.1871 | 837.6256 | 875.6615 | 893.3411 | 937.1981 | 961.4068 | 979.8217 | 987.4476 |
| 774.8398 | 781.9345 | 818.41   | 878.0749 | 893.0855 | 902.6044 | 925.092  | 947.9474 | 962.7879 |
| 789.1257 | 797.2981 | 836.9072 | 875.651  | 897.6757 | 924.0051 | 952.034  | 979.3726 | 987.8699 |
| 774.8398 | 781.9345 | 818.41   | 878.0749 | 893.0855 | 902.6044 | 925.092  | 947.9474 | 962.7879 |
| 780.2932 | 783.1074 | 814.9221 | 829.6096 | 870.5917 | 879.2981 | 903.788  | 917.8355 | 982.3732 |
| 772.2861 | 785.1533 | 832.6884 | 876.9701 | 896.0377 | 920.6495 | 923.2356 | 982.9987 | 1003.955 |
| 780.5714 | 788.5247 | 809.776  | 843.9874 | 876.2272 | 896.639  | 898.8397 | 919.8633 | 997.4391 |
| 781.7232 | 808.3651 | 820.5135 | 877.949  | 887.2666 | 894.4744 | 906.5239 | 976.6658 | 1001.72  |
| 779.296  | 786.8065 | 832.7701 | 855.8627 | 877.4803 | 904.0607 | 908.016  | 936.2892 | 1002.371 |
| 782.8004 | 785.5419 | 847.3249 | 876.5187 | 893.6165 | 910.0926 | 924.7321 | 979.8606 | 1003.956 |
| 781.6638 | 786.6557 | 815.9555 | 852.9317 | 878.2483 | 896.3197 | 910.8838 | 925.1276 | 997.4325 |
| 783.589  | 801.6012 | 862.1293 | 878.9508 | 889.0624 | 902.516  | 912.7309 | 975.8082 | 1002.039 |
| 779.5029 | 790.7113 | 832.2102 | 886.6717 | 887.2553 | 901.9582 | 914.3131 | 931.2394 | 971.0172 |
| 779.6119 | 788.4185 | 882.7855 | 885.4492 | 891.0035 | 915.3284 | 924.834  | 950.53   | 975.5893 |
| 778.8247 | 804.9527 | 828.5507 | 875.0966 | 880.3016 | 893.2044 | 897.5464 | 918.3994 | 985.4026 |
| 782.0507 | 789.5051 | 843.7726 | 876.8642 | 888.9298 | 895.508  | 922.708  | 937.532  | 981.0681 |
| 782.1031 | 791.6186 | 822.721  | 885.8814 | 892.6458 | 910.8355 | 925.2563 | 945.8572 | 975.2299 |
| 776.5841 | 778.6515 | 882.7164 | 888.5135 | 896.4166 | 916.2789 | 933.6469 | 947.4703 | 974.3295 |
| 781.7115 | 787.4303 | 864.0577 | 877.5545 | 892.304  | 896.8717 | 926.5332 | 943.0249 | 981.5352 |
| 777.3895 | 793.7385 | 869.0347 | 881.5382 | 897.256  | 899.9268 | 913.6797 | 953.4096 | 986.8055 |

|          |          |          |          |          |          |          |          |          |
|----------|----------|----------|----------|----------|----------|----------|----------|----------|
| 964.8926 | 1003.643 | 1014.756 | 1035.461 | 1053.284 | 1063.39  | 1105.448 | 1114.822 | 1140.358 |
| 963.0466 | 1002.975 | 1035.96  | 1042.412 | 1053.789 | 1094.964 | 1105.154 | 1121.673 | 1139.965 |
| 976.8608 | 1010.691 | 1024.272 | 1054.852 | 1058.291 | 1081.548 | 1113.502 | 1134.801 | 1144.096 |
| 994.3575 | 1028.848 | 1031.925 | 1050.86  | 1055.332 | 1086.535 | 1112.59  | 1131.798 | 1151.233 |
| 1001.182 | 1015.148 | 1025.489 | 1027.863 | 1058.292 | 1068.022 | 1098.347 | 1119.277 | 1129.322 |
| 981.0493 | 998.6474 | 1025.698 | 1038.243 | 1057.879 | 1072.943 | 1081.818 | 1124.318 | 1145.413 |
| 1002.385 | 1022.325 | 1026.592 | 1048.346 | 1056.563 | 1071.72  | 1108.632 | 1129.517 | 1142.456 |
| 979.0255 | 998.058  | 1024.587 | 1047.634 | 1056.107 | 1072.871 | 1099.216 | 1133.942 | 1146.497 |
| 995.0931 | 1003.557 | 1029.924 | 1041.56  | 1052.23  | 1092.157 | 1095.507 | 1120.726 | 1128.957 |
| 979.0255 | 998.058  | 1024.587 | 1047.634 | 1056.107 | 1072.871 | 1099.216 | 1133.942 | 1146.497 |
| 1000.85  | 1022.476 | 1029.913 | 1032.341 | 1067.345 | 1089.229 | 1107.228 | 1144.268 | 1160.509 |
| 1020.474 | 1026.887 | 1035.822 | 1049.809 | 1085.854 | 1100.015 | 1134.107 | 1154.537 | 1171.829 |
| 1006.484 | 1031.077 | 1032.348 | 1034.792 | 1057.425 | 1086.661 | 1105.117 | 1125.081 | 1157.073 |
| 1014.888 | 1028.334 | 1034.999 | 1051.631 | 1061.952 | 1101.211 | 1111.078 | 1122.557 | 1164.688 |
| 1023.671 | 1027.284 | 1029.936 | 1034.141 | 1065.234 | 1084.649 | 1109.298 | 1134.232 | 1155.145 |
| 1022.995 | 1026.808 | 1035.631 | 1063.06  | 1074.421 | 1098.351 | 1124.982 | 1136.908 | 1170.111 |
| 1007.807 | 1022.53  | 1030.877 | 1033.333 | 1069.062 | 1107.206 | 1108.896 | 1147.526 | 1166.337 |
| 1018.384 | 1029.194 | 1034.731 | 1066.784 | 1081.01  | 1104.298 | 1106.271 | 1149.122 | 1165.198 |
| 989.58   | 1015.768 | 1018.563 | 1046.057 | 1056.364 | 1090.728 | 1108.617 | 1141.755 | 1156.583 |
| 1007.605 | 1020.664 | 1022.102 | 1050.222 | 1055.885 | 1090.182 | 1123.207 | 1150.374 | 1160.454 |
| 995.3971 | 1017.141 | 1022.308 | 1043.067 | 1052.661 | 1093.141 | 1110.202 | 1134.448 | 1148.622 |
| 993.9211 | 1020.336 | 1028.11  | 1042.059 | 1046.951 | 1097.968 | 1104.366 | 1140.81  | 1159.255 |
| 1008.764 | 1021.118 | 1034.543 | 1055.27  | 1085.407 | 1114.389 | 1131.574 | 1151.095 | 1178.551 |
| 1006.25  | 1020.982 | 1030.422 | 1055.426 | 1073.597 | 1108.16  | 1135.407 | 1149.988 | 1180.861 |
| 1015.607 | 1020.122 | 1024.491 | 1047.295 | 1077.866 | 1102.173 | 1130.726 | 1138.894 | 1157.919 |
| 1008.307 | 1023.017 | 1024.346 | 1041.208 | 1083.362 | 1112.625 | 1119.165 | 1138.322 | 1177.184 |

|          |          |          |          |          |          |          |          |          |
|----------|----------|----------|----------|----------|----------|----------|----------|----------|
| 1172.247 | 1180.534 | 1196.072 | 1232.946 | 1276.707 | 1284.425 | 1298.18  | 1348.366 | 1369.672 |
| 1171.621 | 1183.995 | 1195.238 | 1229.961 | 1276.369 | 1279.952 | 1297.401 | 1346.249 | 1374.599 |
| 1183.004 | 1197.748 | 1209.242 | 1219.432 | 1240.877 | 1259.61  | 1273.643 | 1306.728 | 1324.892 |
| 1160.224 | 1183.084 | 1194.372 | 1200.016 | 1239.454 | 1247.044 | 1266.301 | 1287.32  | 1314.119 |
| 1162.387 | 1180.614 | 1190.23  | 1204.123 | 1241.282 | 1253.186 | 1260.855 | 1276.216 | 1304.185 |
| 1169.606 | 1190.575 | 1204.944 | 1217.071 | 1234.618 | 1249.6   | 1260.62  | 1294.28  | 1311.34  |
| 1162.5   | 1182.243 | 1194.198 | 1201.865 | 1242.47  | 1255.648 | 1276.191 | 1285.177 | 1310.451 |
| 1170.728 | 1196.112 | 1203.03  | 1219.575 | 1235.774 | 1250.778 | 1292.761 | 1303.57  | 1335.758 |
| 1157.398 | 1184.444 | 1195.715 | 1197.874 | 1231.203 | 1246.014 | 1259.328 | 1274.239 | 1306.804 |
| 1170.728 | 1196.112 | 1203.03  | 1219.575 | 1235.774 | 1250.778 | 1292.761 | 1303.57  | 1335.758 |
| 1167.988 | 1186.784 | 1208.726 | 1239.01  | 1254.99  | 1263.058 | 1285.617 | 1316.488 | 1338.462 |
| 1178.218 | 1199.141 | 1207.091 | 1239.315 | 1243.918 | 1257.785 | 1285.905 | 1316.268 | 1350.215 |
| 1178.206 | 1193.1   | 1208.64  | 1248.594 | 1254.687 | 1262.758 | 1274.855 | 1310.267 | 1328.321 |
| 1184.953 | 1203.904 | 1213.794 | 1227.659 | 1250.926 | 1251.579 | 1276.767 | 1319.722 | 1325.038 |
| 1172.067 | 1197.157 | 1213.558 | 1219.622 | 1248.4   | 1254.994 | 1282.624 | 1312.938 | 1341.536 |
| 1182.67  | 1204.501 | 1215.166 | 1239.503 | 1246.339 | 1252.386 | 1275.989 | 1323.367 | 1341.362 |
| 1184.415 | 1188.667 | 1207.226 | 1242.949 | 1255.786 | 1269.875 | 1282.794 | 1313.503 | 1339.16  |
| 1184.798 | 1200.664 | 1210.679 | 1236.826 | 1250.637 | 1267.431 | 1290.883 | 1318.201 | 1335.978 |
| 1185.581 | 1199.329 | 1225.831 | 1258.494 | 1283.089 | 1295.147 | 1305.939 | 1318.332 | 1345.881 |
| 1187.115 | 1201.009 | 1221.292 | 1250.552 | 1271.614 | 1285.379 | 1291.015 | 1325.32  | 1353.569 |
| 1178.736 | 1198.54  | 1215.208 | 1263.247 | 1273.692 | 1283.38  | 1306.934 | 1335.503 | 1348.434 |
| 1178.496 | 1197.124 | 1214.253 | 1263.732 | 1274.807 | 1283.776 | 1325.725 | 1340.267 | 1354.437 |
| 1186.709 | 1201.889 | 1220.772 | 1253.029 | 1265.135 | 1293.263 | 1317.828 | 1343.486 | 1358.223 |
| 1192.862 | 1202.328 | 1231.302 | 1241.829 | 1254.879 | 1290.336 | 1320.296 | 1342.718 | 1353.357 |
| 1179.996 | 1198.992 | 1213.264 | 1251.215 | 1268.257 | 1282.781 | 1330.155 | 1345.481 | 1365.721 |
| 1180.465 | 1202.175 | 1218.818 | 1249.093 | 1269.981 | 1280.85  | 1336.146 | 1349.391 | 1372.028 |

|          |          |          |          |          |          |          |          |          |
|----------|----------|----------|----------|----------|----------|----------|----------|----------|
| 1388.042 | 1403.704 | 1408.153 | 1417.806 | 1425.091 | 1479.752 | 1482.823 | 1491.846 | 1505.964 |
| 1383.935 | 1402.798 | 1410.328 | 1417.575 | 1436.527 | 1462.235 | 1476.923 | 1483.193 | 1503.837 |
| 1342.135 | 1379.409 | 1381.767 | 1388.755 | 1413.607 | 1447.919 | 1491.947 | 1508.361 | 1509.635 |
| 1335.116 | 1352.26  | 1390.305 | 1398.875 | 1417.221 | 1447.051 | 1457.955 | 1489.237 | 1506.541 |
| 1324.379 | 1346.129 | 1384.068 | 1402.197 | 1408.719 | 1432.254 | 1464.075 | 1481.847 | 1509.363 |
| 1330.756 | 1359.404 | 1368.312 | 1408.307 | 1412.593 | 1436.934 | 1488.042 | 1502.593 | 1507.424 |
| 1330.377 | 1350.451 | 1388.728 | 1393.135 | 1410.018 | 1446.755 | 1462.14  | 1488.398 | 1508.788 |
| 1340.683 | 1363.253 | 1381.27  | 1393.424 | 1409.993 | 1445.664 | 1493.447 | 1503.115 | 1509.929 |
| 1320.61  | 1344.013 | 1377.57  | 1401.892 | 1410.903 | 1438.556 | 1459.693 | 1488.254 | 1503.568 |
| 1340.683 | 1363.253 | 1381.27  | 1393.424 | 1409.993 | 1445.664 | 1493.447 | 1503.115 | 1509.929 |
| 1355.583 | 1373.174 | 1397.781 | 1406.203 | 1437.624 | 1444.268 | 1474.148 | 1489.646 | 1511.15  |
| 1361.997 | 1389.603 | 1396.697 | 1422.335 | 1439.307 | 1446.466 | 1454.581 | 1476.274 | 1493.055 |
| 1355.862 | 1369.322 | 1399.301 | 1421.026 | 1439.07  | 1445.537 | 1476.546 | 1487.911 | 1505.948 |
| 1352.14  | 1382.2   | 1394.057 | 1419.843 | 1439.294 | 1442.196 | 1474.329 | 1485.835 | 1493.307 |
| 1348.46  | 1379.566 | 1397.913 | 1423.614 | 1438.546 | 1443.848 | 1463.097 | 1475.195 | 1491.927 |
| 1354.542 | 1387.775 | 1389.566 | 1420.016 | 1437.807 | 1442.939 | 1454.195 | 1474.639 | 1493.222 |
| 1347.252 | 1366.726 | 1391.072 | 1400.039 | 1438.309 | 1443.587 | 1473.907 | 1487.471 | 1507.929 |
| 1344.629 | 1376.484 | 1392.938 | 1400.601 | 1437.736 | 1443.191 | 1473.44  | 1483.991 | 1490.403 |
| 1375.901 | 1382.503 | 1412.868 | 1432.302 | 1487.652 | 1496.387 | 1506.89  | 1516.301 | 1520.642 |
| 1368.701 | 1377.093 | 1411.568 | 1431.643 | 1466.002 | 1491.133 | 1502.153 | 1511.936 | 1517.264 |
| 1370.907 | 1416.649 | 1430.878 | 1437.618 | 1474.12  | 1495.114 | 1502.592 | 1506.297 | 1515.028 |
| 1369.959 | 1413.336 | 1431.035 | 1433.091 | 1475.992 | 1481.548 | 1498.775 | 1506.038 | 1515.212 |
| 1373.813 | 1386.872 | 1412.803 | 1415.289 | 1444.935 | 1492.726 | 1503.367 | 1512.054 | 1515.715 |
| 1372.86  | 1378.158 | 1410.422 | 1412.392 | 1443.746 | 1494.637 | 1507.128 | 1509.06  | 1516.333 |
| 1384.291 | 1413.816 | 1423.001 | 1433.733 | 1444.099 | 1477.843 | 1503.214 | 1505.794 | 1510.952 |
| 1389.456 | 1411.528 | 1417.615 | 1439.634 | 1449.554 | 1479.79  | 1499.976 | 1505.532 | 1509.473 |

|          |          |          |          |          |          |          |          |          |
|----------|----------|----------|----------|----------|----------|----------|----------|----------|
| 1508.21  | 1512.218 | 1550.723 | 1570.487 | 1614.67  | 1647.878 | 1696.743 | 1775.568 | 3078.557 |
| 1506.575 | 1512.012 | 1522.072 | 1550.044 | 1614.472 | 1647.57  | 1696.477 | 1790.134 | 3076.433 |
| 1515.066 | 1519.24  | 1525.374 | 1529.978 | 1546.792 | 1609.707 | 1668.641 | 1699.672 | 3080.141 |
| 1515.251 | 1516.613 | 1525.244 | 1529.76  | 1556.831 | 1630.088 | 1670.581 | 1703.442 | 2945.738 |
| 1513.875 | 1523.669 | 1526.207 | 1528.223 | 1566.281 | 1631.003 | 1670.894 | 1704.456 | 3055.984 |
| 1509.954 | 1515.605 | 1520.711 | 1527.505 | 1536.369 | 1615.984 | 1668.476 | 1700.513 | 3094.041 |
| 1513.194 | 1520.288 | 1527.398 | 1531.389 | 1558.442 | 1630.364 | 1671.9   | 1704.456 | 2972.157 |
| 1513.382 | 1518.524 | 1526.616 | 1530.717 | 1535.032 | 1611.623 | 1669.071 | 1699.755 | 3080.096 |
| 1514.993 | 1520.012 | 1527.556 | 1529.926 | 1567.988 | 1629.837 | 1668.661 | 1703.488 | 3054.329 |
| 1513.382 | 1518.524 | 1526.616 | 1530.717 | 1535.032 | 1611.623 | 1669.071 | 1699.755 | 3080.096 |
| 1515.808 | 1522.386 | 1529.406 | 1543.219 | 1550.797 | 1617.6   | 1628.138 | 1708     | 3083.682 |
| 1494.671 | 1516.027 | 1527.239 | 1534.822 | 1542.876 | 1624.65  | 1627.576 | 1713.906 | 2988.808 |
| 1513.484 | 1520.937 | 1537.571 | 1539.261 | 1544.778 | 1612.8   | 1628.852 | 1706.86  | 3088.564 |
| 1498.972 | 1516.8   | 1517.942 | 1540.207 | 1547.982 | 1620.561 | 1628.104 | 1711.953 | 3040.591 |
| 1506.42  | 1518.004 | 1518.316 | 1535.719 | 1539.302 | 1620.625 | 1626.769 | 1709.553 | 3059.572 |
| 1498.911 | 1519.191 | 1524.257 | 1536.145 | 1542.32  | 1623.995 | 1627.455 | 1712.929 | 2988.719 |
| 1511.267 | 1519.804 | 1525.357 | 1538.54  | 1544.684 | 1611.084 | 1628.881 | 1706.143 | 3082.654 |
| 1500.133 | 1515.543 | 1529.416 | 1533.408 | 1540.565 | 1620.204 | 1627.974 | 1711.725 | 2988.227 |
| 1532.349 | 1542.092 | 1546.92  | 1559.448 | 1577.373 | 1663.445 | 1695.493 | 3084.208 | 3111.061 |
| 1519.548 | 1529.722 | 1536.195 | 1539.871 | 1581.452 | 1665.639 | 1696.7   | 3090.094 | 3102.486 |
| 1524.665 | 1538.958 | 1553.272 | 1572.394 | 1578.108 | 1636.416 | 1696.914 | 3087.254 | 3119.941 |
| 1535.637 | 1540.301 | 1550.432 | 1571.843 | 1578.316 | 1641.355 | 1696.523 | 3086.926 | 3104.113 |
| 1519.042 | 1536.161 | 1540.215 | 1565.886 | 1579.852 | 1665.629 | 1695.876 | 3088.567 | 3110.186 |
| 1519.831 | 1531.942 | 1532.785 | 1552.876 | 1586.492 | 1666.456 | 1696.168 | 3084.2   | 3101.07  |
| 1517.251 | 1530.678 | 1543.345 | 1571.065 | 1609.555 | 1641.736 | 1696.594 | 3082.513 | 3110.878 |
| 1513.228 | 1521.842 | 1532.509 | 1581.402 | 1582.819 | 1635.185 | 1697.898 | 3085.285 | 3093.925 |

|          |          |          |          |          |          |          |          |          |
|----------|----------|----------|----------|----------|----------|----------|----------|----------|
| 3093.983 | 3109.338 | 3136.392 | 3146.674 | 3179.588 | 3198.446 | 3213.458 | 3227.885 | 3229.511 |
| 3091.608 | 3106.336 | 3141.471 | 3145.138 | 3171.791 | 3194.403 | 3198.375 | 3217.649 | 3229.296 |
| 3090.012 | 3104.104 | 3113.351 | 3155.827 | 3169.93  | 3173.739 | 3174.931 | 3235.242 | 3240.96  |
| 3035.531 | 3086.736 | 3119.649 | 3144.425 | 3157.35  | 3179.802 | 3183.548 | 3238.858 | 3244.646 |
| 3076.433 | 3083.429 | 3122.616 | 3139.127 | 3161.798 | 3171.746 | 3174.222 | 3239.018 | 3243.58  |
| 3095.441 | 3097.822 | 3102.658 | 3164.195 | 3177.785 | 3181.277 | 3187.012 | 3237.138 | 3241.655 |
| 3042.3   | 3082.544 | 3121.055 | 3146.567 | 3161.178 | 3167.303 | 3174.625 | 3235.15  | 3241.625 |
| 3095.824 | 3098.194 | 3102.589 | 3159.269 | 3164.494 | 3175.389 | 3181.472 | 3232.706 | 3240.474 |
| 3074.368 | 3104.974 | 3120.823 | 3133.382 | 3150.226 | 3163.106 | 3179.225 | 3238.895 | 3244.769 |
| 3095.824 | 3098.194 | 3102.589 | 3159.269 | 3164.494 | 3175.389 | 3181.472 | 3232.706 | 3240.474 |
| 3086.28  | 3098.776 | 3104.341 | 3113.97  | 3160.951 | 3171.484 | 3184.23  | 3187.615 | 3238.222 |
| 2997.86  | 3031.382 | 3064.081 | 3087.613 | 3120.793 | 3163.812 | 3163.99  | 3178.447 | 3238.812 |
| 3099.372 | 3119.749 | 3122.405 | 3129.796 | 3159.245 | 3178.83  | 3183.38  | 3186.787 | 3237.713 |
| 3086.637 | 3087.952 | 3103.972 | 3112.037 | 3160.326 | 3162.747 | 3167.482 | 3169.219 | 3238.134 |
| 3072.323 | 3077.491 | 3097.939 | 3114.145 | 3115.874 | 3153.72  | 3169.667 | 3186.672 | 3238.895 |
| 3034.542 | 3063.525 | 3070.323 | 3084.938 | 3120.992 | 3145.761 | 3162.228 | 3162.726 | 3238.906 |
| 3091.654 | 3096.106 | 3106.143 | 3129.164 | 3163.605 | 3164.2   | 3178.952 | 3181.454 | 3238.199 |
| 3015.717 | 3083.575 | 3094.823 | 3111.343 | 3161.78  | 3162.217 | 3167.017 | 3170.915 | 3238.607 |
| 3135.531 | 3155.338 | 3165.127 | 3192.445 | 3198.247 | 3215.191 | 3215.984 | 3236.938 | 3244.905 |
| 3128.069 | 3160.57  | 3167.264 | 3174.77  | 3191.43  | 3208.547 | 3229.053 | 3238.308 | 3246.835 |
| 3139.003 | 3167.035 | 3172.421 | 3195.201 | 3201.772 | 3213.777 | 3232.902 | 3237.817 | 3248.612 |
| 3140.297 | 3163.124 | 3171.062 | 3198.021 | 3201.399 | 3217.449 | 3232.414 | 3236.826 | 3247.404 |
| 3120.202 | 3156.755 | 3159.89  | 3166.432 | 3186.176 | 3188.488 | 3224.449 | 3238.037 | 3246.01  |
| 3109.583 | 3147.726 | 3160.131 | 3161.644 | 3178.953 | 3188.399 | 3229.198 | 3238.319 | 3246.971 |
| 3123.041 | 3155.163 | 3168.763 | 3186.326 | 3194.041 | 3199.51  | 3232.402 | 3237.021 | 3247.564 |
| 3120.968 | 3153.292 | 3155.147 | 3180.776 | 3191.572 | 3199.544 | 3234.453 | 3238.743 | 3248.099 |

|          |          |          |          |          |
|----------|----------|----------|----------|----------|
| 3237.358 | 3250.872 | 3292.342 | 3373.317 | 3697.857 |
| 3236.306 | 3250.617 | 3292.607 | 3401.178 | 3698.243 |
| 3249.247 | 3260.176 | 3278.739 | 3587.667 | 3621.05  |
| 3257.28  | 3262.649 | 3278.238 | 3582.511 | 3606.287 |
| 3252.823 | 3261.168 | 3292.135 | 3592.618 | 3607.948 |
| 3250.337 | 3260.392 | 3277.666 | 3585.34  | 3618.995 |
| 3249.794 | 3260.712 | 3292.153 | 3588.207 | 3606.952 |
| 3248.74  | 3260.085 | 3281.395 | 3567.538 | 3620.026 |
| 3257.805 | 3263.731 | 3284.994 | 3590.433 | 3606.233 |
| 3248.74  | 3260.085 | 3281.395 | 3567.538 | 3620.026 |
| 3246.365 | 3253.906 | 3262.754 | 3579.376 | 3677.422 |
| 3247.987 | 3254.928 | 3264.082 | 3587.536 | 3681.067 |
| 3245.56  | 3253.157 | 3262.168 | 3609.846 | 3679.746 |
| 3247.577 | 3254.485 | 3263.533 | 3619.825 | 3674.984 |
| 3247.075 | 3254.872 | 3263.139 | 3580.378 | 3675.674 |
| 3248.303 | 3255.45  | 3264.039 | 3591.067 | 3677.427 |
| 3246.326 | 3253.69  | 3262.488 | 3595.436 | 3685.59  |
| 3248.659 | 3255.174 | 3264.007 | 3611.906 | 3680.738 |

|          |          |          |          |
|----------|----------|----------|----------|
| 3257.21  | 3292.829 | 3603.894 | 3659.004 |
| 3257.974 | 3282.243 | 3595.431 | 3649.693 |
| 3257.513 | 3269.424 | 3607.228 | 3687.278 |
| 3256.98  | 3267.717 | 3615.861 | 3690.393 |
| 3257.809 | 3284.042 | 3589.497 | 3647.4   |
| 3258.409 | 3284.039 | 3585.345 | 3642.704 |
| 3256.917 | 3270.332 | 3607.154 | 3692.014 |
| 3249.14  | 3258.211 | 3575.919 | 3692.117 |
